# Supplementary material for: The Influence of 5′,8-Cyclo-2′-deoxypurines on the Mitochondrial Repair of Clustered DNA Damage in Xrs5 Cells: The Preliminary Study
Source: MDPI journal article supplement (doi:10.3390/molecules26227042), 2021-11-22
Supplement: s1 [file s1]

# The influence of 5',8-cyclo-2'-deoxypurines on the mitochondrial repair of clustered DNA damage in xrs5 cells. The preliminary study.

## Supplementary Materials

| Page  | Item              | Title                                                                          |
|-------|-------------------|--------------------------------------------------------------------------------|
| 2     | <b>Table S1</b>   | The sequences of double-stranded substrate oligonucleotides.                   |
| 3     | <b>Figure S1</b>  | The stability of „matrix“ oligonucleotides.                                    |
| 4     | <b>Table S2</b>   | Endonuclease activity – Control 1. Raw numerical data.                         |
| 4     | <b>Table S3</b>   | Polymerase activity – Control 1. Raw numerical data.                           |
| 5     | <b>Figure S2</b>  | The autoradiograms – ScdA.                                                     |
| 6     | <b>Figure S3</b>  | The autoradiograms – RcdA.                                                     |
| 7     | <b>Table S4</b>   | Endonuclease activity – ScdA and RcdA. Raw numerical data.                     |
| 8     | <b>Table S5</b>   | Polymerase activity – ScdA and RcdA. Raw numerical data.                       |
| 9-10  | <b>Figure S4</b>  | Graphical representation of the results for ScdA.                              |
| 10-11 | <b>Figure S5</b>  | Graphical representation of the results for RcdA.                              |
| 12-15 | <b>Figure S6</b>  | Endonuclease activity [%] of ScdA vs. RcdA – comparison of individual strands. |
| 16-19 | <b>Figure S7</b>  | Polymerase activity [%] of ScdA vs. RcdA – comparison of individual strands.   |
| 20    | <b>Figure S8</b>  | The autoradiograms – ScdG.                                                     |
| 21    | <b>Figure S9</b>  | The autoradiograms – RcdG.                                                     |
| 22    | <b>Table S6</b>   | Endonuclease activity – ScdG and RcdG. Raw numerical data.                     |
| 23    | <b>Table S7</b>   | Polymerase activity – ScdG and RcdG. Raw numerical data.                       |
| 24-25 | <b>Figure S10</b> | Graphical representation of the results for ScdG.                              |
| 25-26 | <b>Figure S11</b> | Graphical representation of the results for RcdG.                              |
| 27-30 | <b>Figure S12</b> | Endonuclease activity [%] of ScdG vs. RcdG – comparison of individual strands. |
| 30-34 | <b>Figure S13</b> | Polymerase activity [%] of ScdG vs. RcdG – comparison of individual strands.   |
| 35    | <b>Figure S14</b> | Functional activity test of mitochondrial extract.                             |

**Table S1.** The sequences of double-stranded substrate oligonucleotides containing 2'-deoxyuridine (dU) and 5',8-cyclo-2'-deoxyadenosine (cdA) or 5',8-cyclo-2'-deoxyguanosine (cdG).

| Oligonucleotide |           | Sequence                                                                                                                |
|-----------------|-----------|-------------------------------------------------------------------------------------------------------------------------|
| ScdA / RcdA     | Control 1 | * 5' -CTCTTGT CAGGAATATTGTC <b>U</b> CTATGCTCCCACCAAAGGC-3'<br>3' -GAGAACAGTCCTTATAACAGAGATACGAGGGTGGTTTCCG-5'          |
|                 | Control 2 | * 5' -GCCTTTGGTGGGAGCATAG <b>X</b> GACAATATTCCTGACAAGAG-3'<br>3' -CGGAAACCACCCTCGTATCTCTGTTATAAGGACTGTTCTC-5'           |
|                 | dU -7     | * 5' -CTCTTGT CAGGA <b>U</b> ATTGTCTCTATGCTCCCACCAAAGGC-3'<br>3' -GAGAACAGTCCTTATAACAG <b>X</b> GATACGAGGGTGGTTTCCG-5'  |
|                 | dU -4     | * 5' -CTCTTGT CAGGAATAT <b>U</b> GTCTCTATGCTCCCACCAAAGGC-3'<br>3' -GAGAACAGTCCTTATAACAG <b>X</b> GATACGAGGGTGGTTTCCG-5' |
|                 | dU -1     | * 5' -CTCTTGT CAGGAATATTGT <b>U</b> TCTATGCTCCCACCAAAGGC-3'<br>3' -GAGAACAGTCCTTATAACAG <b>X</b> GATACGAGGGTGGTTTCCG-5' |
|                 | dU 0      | * 5' -CTCTTGT CAGGAATATTGTC <b>U</b> CTATGCTCCCACCAAAGGC-3'<br>3' -GAGAACAGTCCTTATAACAG <b>X</b> GATACGAGGGTGGTTTCCG-5' |
|                 | dU +1     | * 5' -CTCTTGT CAGGAATATTGTCT <b>U</b> TATGCTCCCACCAAAGGC-3'<br>3' -GAGAACAGTCCTTATAACAG <b>X</b> GATACGAGGGTGGTTTCCG-5' |
|                 | dU +4     | * 5' -CTCTTGT CAGGAATATTGTCTCTA <b>U</b> GCTCCCACCAAAGGC-3'<br>3' -GAGAACAGTCCTTATAACAG <b>X</b> GATACGAGGGTGGTTTCCG-5' |
|                 | dU +7     | * 5' -CTCTTGT CAGGAATATTGTCTCTATGC <b>U</b> CCCACCAAAGGC-3'<br>3' -GAGAACAGTCCTTATAACAG <b>X</b> GATACGAGGGTGGTTTCCG-5' |
| ScdG / RcdG     | Control 1 | * 5' -CTCTTGT CAGGAATATTGTC <b>U</b> CTATGCTCCCACCAAAGGC-3'<br>3' -GAGAACAGTCCTTATAACAGAGATACGAGGGTGGTTTCCG-5'          |
|                 | Control 2 | * 5' -GCCTTTGGTGGGAGCATAG <b>Y</b> GACAATATTCCTGACAAGAG-3'<br>3' -CGGAAACCACCCTCGTATCTCTGTTATAAGGACTGTTCTC-5'           |
|                 | dU -7     | * 5' -CTCTTGT CAGGA <b>U</b> ATTGTCCCTATGCTCCCACCAAAGGC-3'<br>3' -GAGAACAGTCCTTATAACAG <b>Y</b> GATACGAGGGTGGTTTCCG-5'  |
|                 | dU -4     | * 5' -CTCTTGT CAGGAATAT <b>U</b> GTCCCTATGCTCCCACCAAAGGC-3'<br>3' -GAGAACAGTCCTTATAACAG <b>Y</b> GATACGAGGGTGGTTTCCG-5' |
|                 | dU -1     | * 5' -CTCTTGT CAGGAATATTGT <b>U</b> CCTATGCTCCCACCAAAGGC-3'<br>3' -GAGAACAGTCCTTATAACAG <b>Y</b> GATACGAGGGTGGTTTCCG-5' |
|                 | dU 0      | * 5' -CTCTTGT CAGGAATATTGTC <b>U</b> CTATGCTCCCACCAAAGGC-3'<br>3' -GAGAACAGTCCTTATAACAG <b>Y</b> GATACGAGGGTGGTTTCCG-5' |
|                 | dU +1     | * 5' -CTCTTGT CAGGAATATTGTCC <b>U</b> TATGCTCCCACCAAAGGC-3'<br>3' -GAGAACAGTCCTTATAACAG <b>Y</b> GATACGAGGGTGGTTTCCG-5' |
|                 | dU +4     | * 5' -CTCTTGT CAGGAATATTGTCCCTA <b>U</b> GCTCCCACCAAAGGC-3'<br>3' -GAGAACAGTCCTTATAACAG <b>Y</b> GATACGAGGGTGGTTTCCG-5' |
|                 | dU +7     | * 5' -CTCTTGT CAGGAATATTGTCCCTATGC <b>U</b> CCCACCAAAGGC-3'<br>3' -GAGAACAGTCCTTATAACAG <b>Y</b> GATACGAGGGTGGTTTCCG-5' |

U – represents dU as an AP site (after treatment with UDG); X – represents (5'S)-5',8-cyclo-2'-deoxyadenosine (ScdA) or (5'R)-5',8-cyclo-2'-deoxyadenosine (RcdA); Y – represents (5'S)-5',8-cyclo-2'-deoxyguanosine (ScdG) or (5'R)-5',8-cyclo-2'-deoxyguanosine (RcdG); \* – represents the 5'-end-labeled strand with [ $\gamma$ -<sup>32</sup>P]ATP

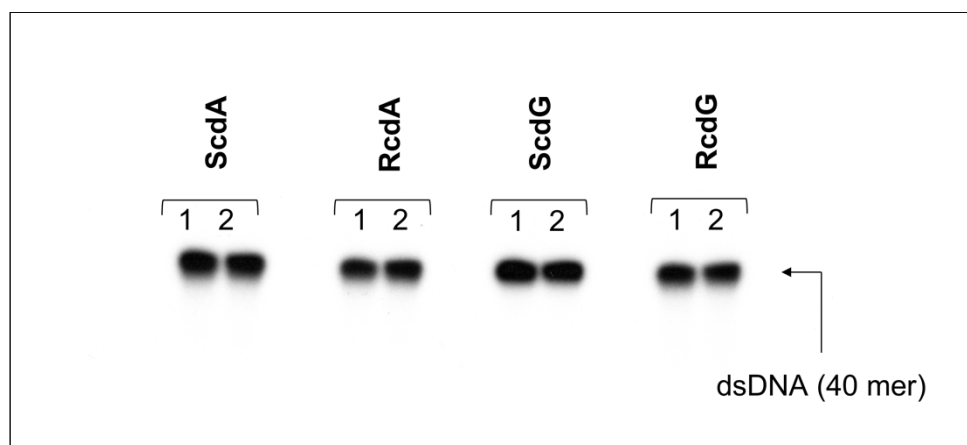

**Figure S1.** The stability of „matrix” oligonucleotides (Control 2) after treatment with 20  $\mu$ g of mitochondrial extracts (ME). Each lane number corresponds with different assay time: lane 1 - 0 min; lane 2 - 6 h.

**Table S2.** Endonuclease activity – Control 1. Raw numerical data of densitometry.

|           |          | Time [h]                  |       |       |       |
|-----------|----------|---------------------------|-------|-------|-------|
|           |          | 0                         | 0,5   | 3     | 6     |
| Strand    | Data set | Endonuclease activity [%] |       |       |       |
| Control 1 | 1.       | 1,39                      | 85,92 | 75,75 | 72,41 |
|           | 2.       | 0,94                      | 82,68 | 76,83 | 71,90 |
|           | 3.       | 0,31                      | 77,43 | 73,06 | 69,80 |
|           | 4.       | 0,76                      | 84,68 | 69,47 | 59,11 |
|           | 5.       | 2,67                      | 70,72 | 59,86 | 55,64 |
|           | 6.       | 2,42                      | 72,21 | 62,02 | 52,42 |
|           | 7.       | 1,41                      | 87,65 | 61,08 | 51,19 |
|           | 8.       | 0,09                      | 74,09 | 63,99 | 54,96 |
|           | 9.       | 0,00                      | 99,06 | 83,54 | 53,02 |
|           | Avg      | 1,35                      | 71,92 | 63,98 | 55,75 |
|           | SD       | 1,66                      | 21,93 | 13,23 | 11,42 |

**Table S3.** Polymerase activity – Control 1. Raw numerical data of densitometry.

|           |          | Time [h]                |       |       |       |
|-----------|----------|-------------------------|-------|-------|-------|
|           |          | 0                       | 0,5   | 3     | 6     |
| Strand    | Data set | Polymerase activity [%] |       |       |       |
| Control 1 | 1.       | 0,00                    | 0,65  | 12,74 | 19,65 |
|           | 2.       | 0,00                    | 2,07  | 10,48 | 19,27 |
|           | 3.       | 0,00                    | 0,93  | 11,08 | 18,72 |
|           | 4.       | 0,04                    | 11,23 | 26,32 | 37,15 |
|           | 5.       | 0,00                    | 12,05 | 29,14 | 34,96 |
|           | 6.       | 0,58                    | 6,65  | 33,60 | 44,75 |
|           | 7.       | 0,00                    | 6,83  | 35,72 | 46,86 |
|           | 8.       | 0,00                    | 4,75  | 33,87 | 44,15 |
|           | 9.       | 0,00                    | 0,00  | 16,28 | 46,54 |
|           | Avg      | 0,18                    | 5,88  | 21,65 | 35,16 |
|           | SD       | 0,47                    | 5,06  | 10,36 | 10,53 |

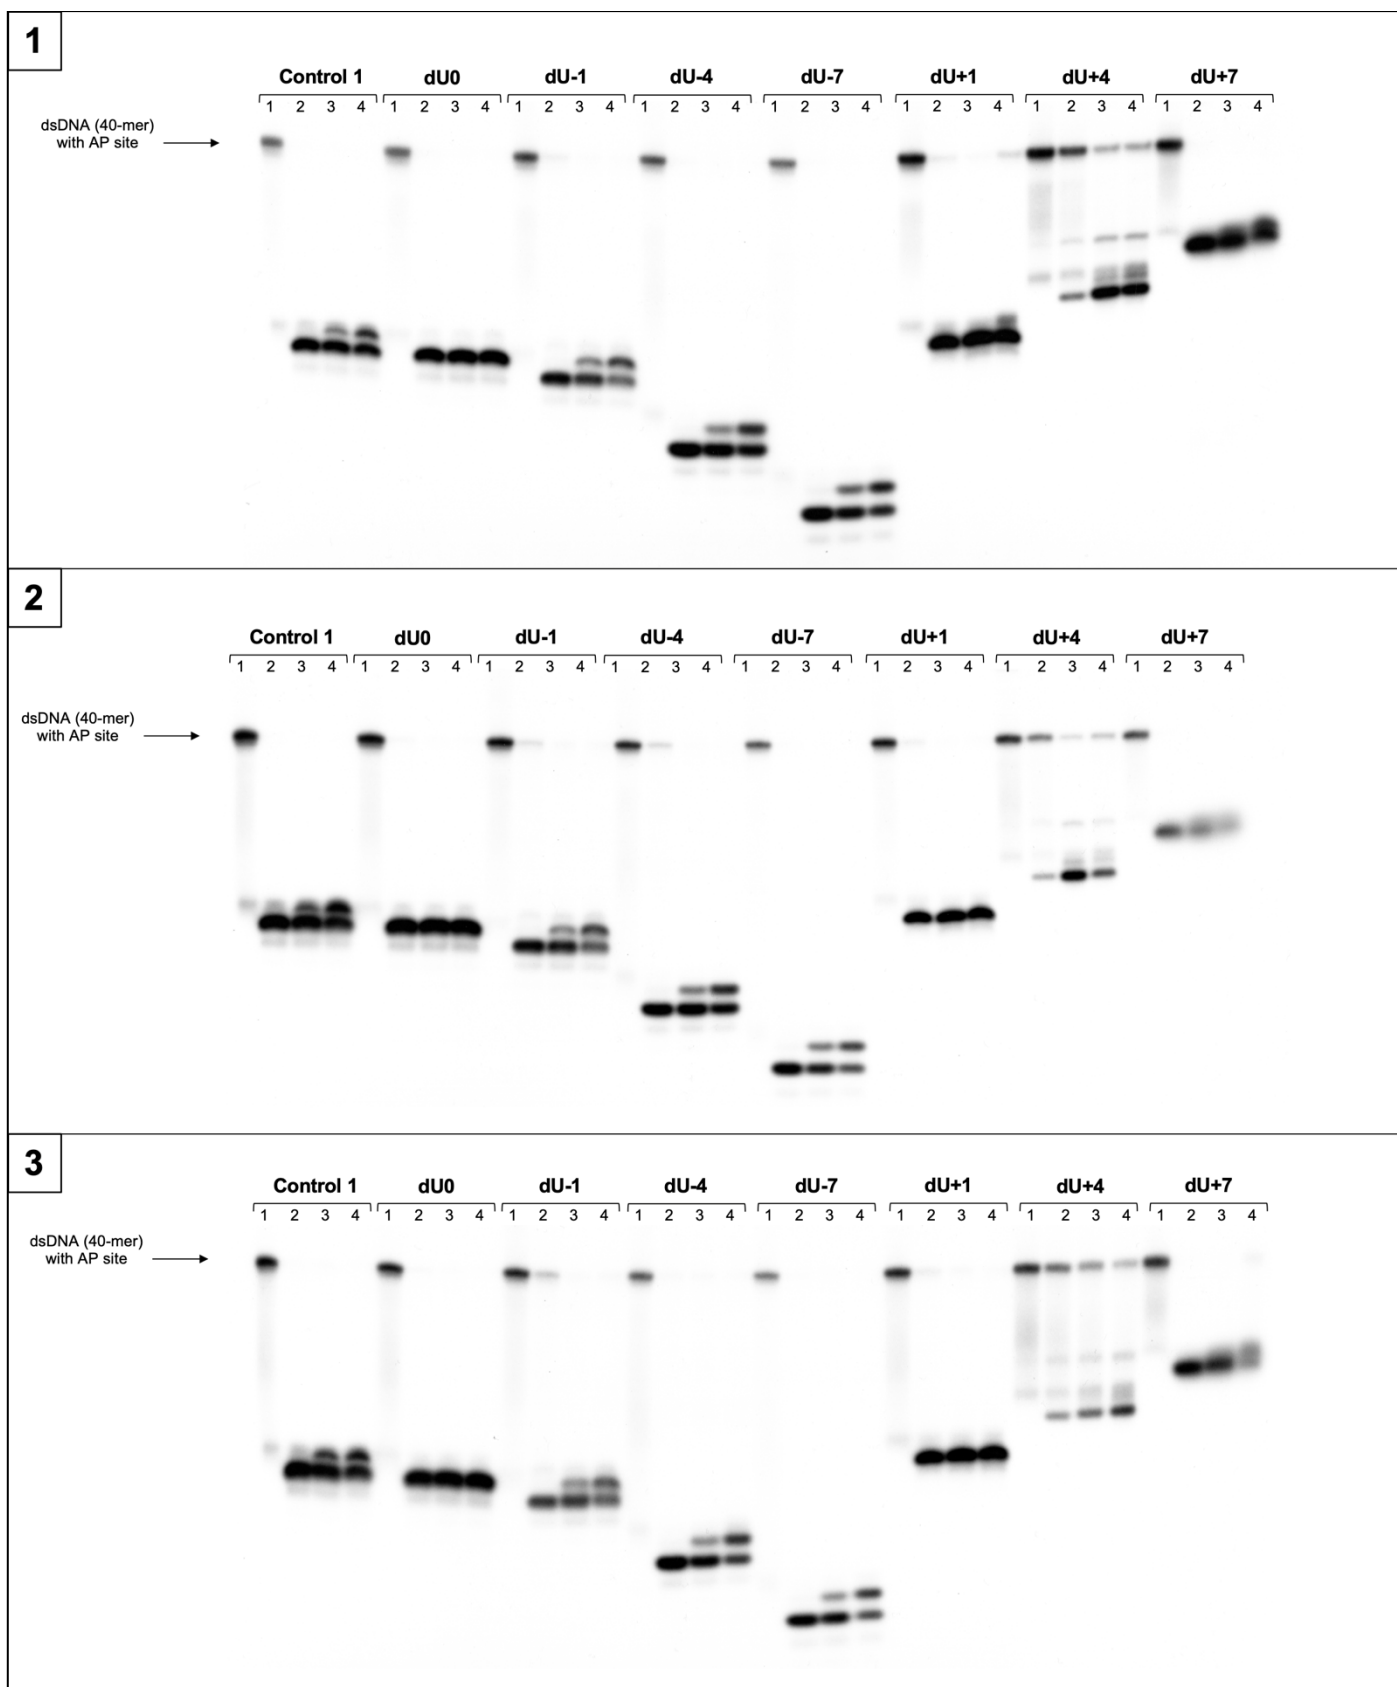

**Figure S2.** The autoradiograms of denaturing PAGE presenting dsDNA containing clustered damage with AP site in one strand and **ScdA** in the opposing strand. Each lane number indicates different assay time: lane 1 - 0 min; lane 2 - 30 min; lane 3 - 3h; lane 4 - 6h. Three experimental replications are presented.

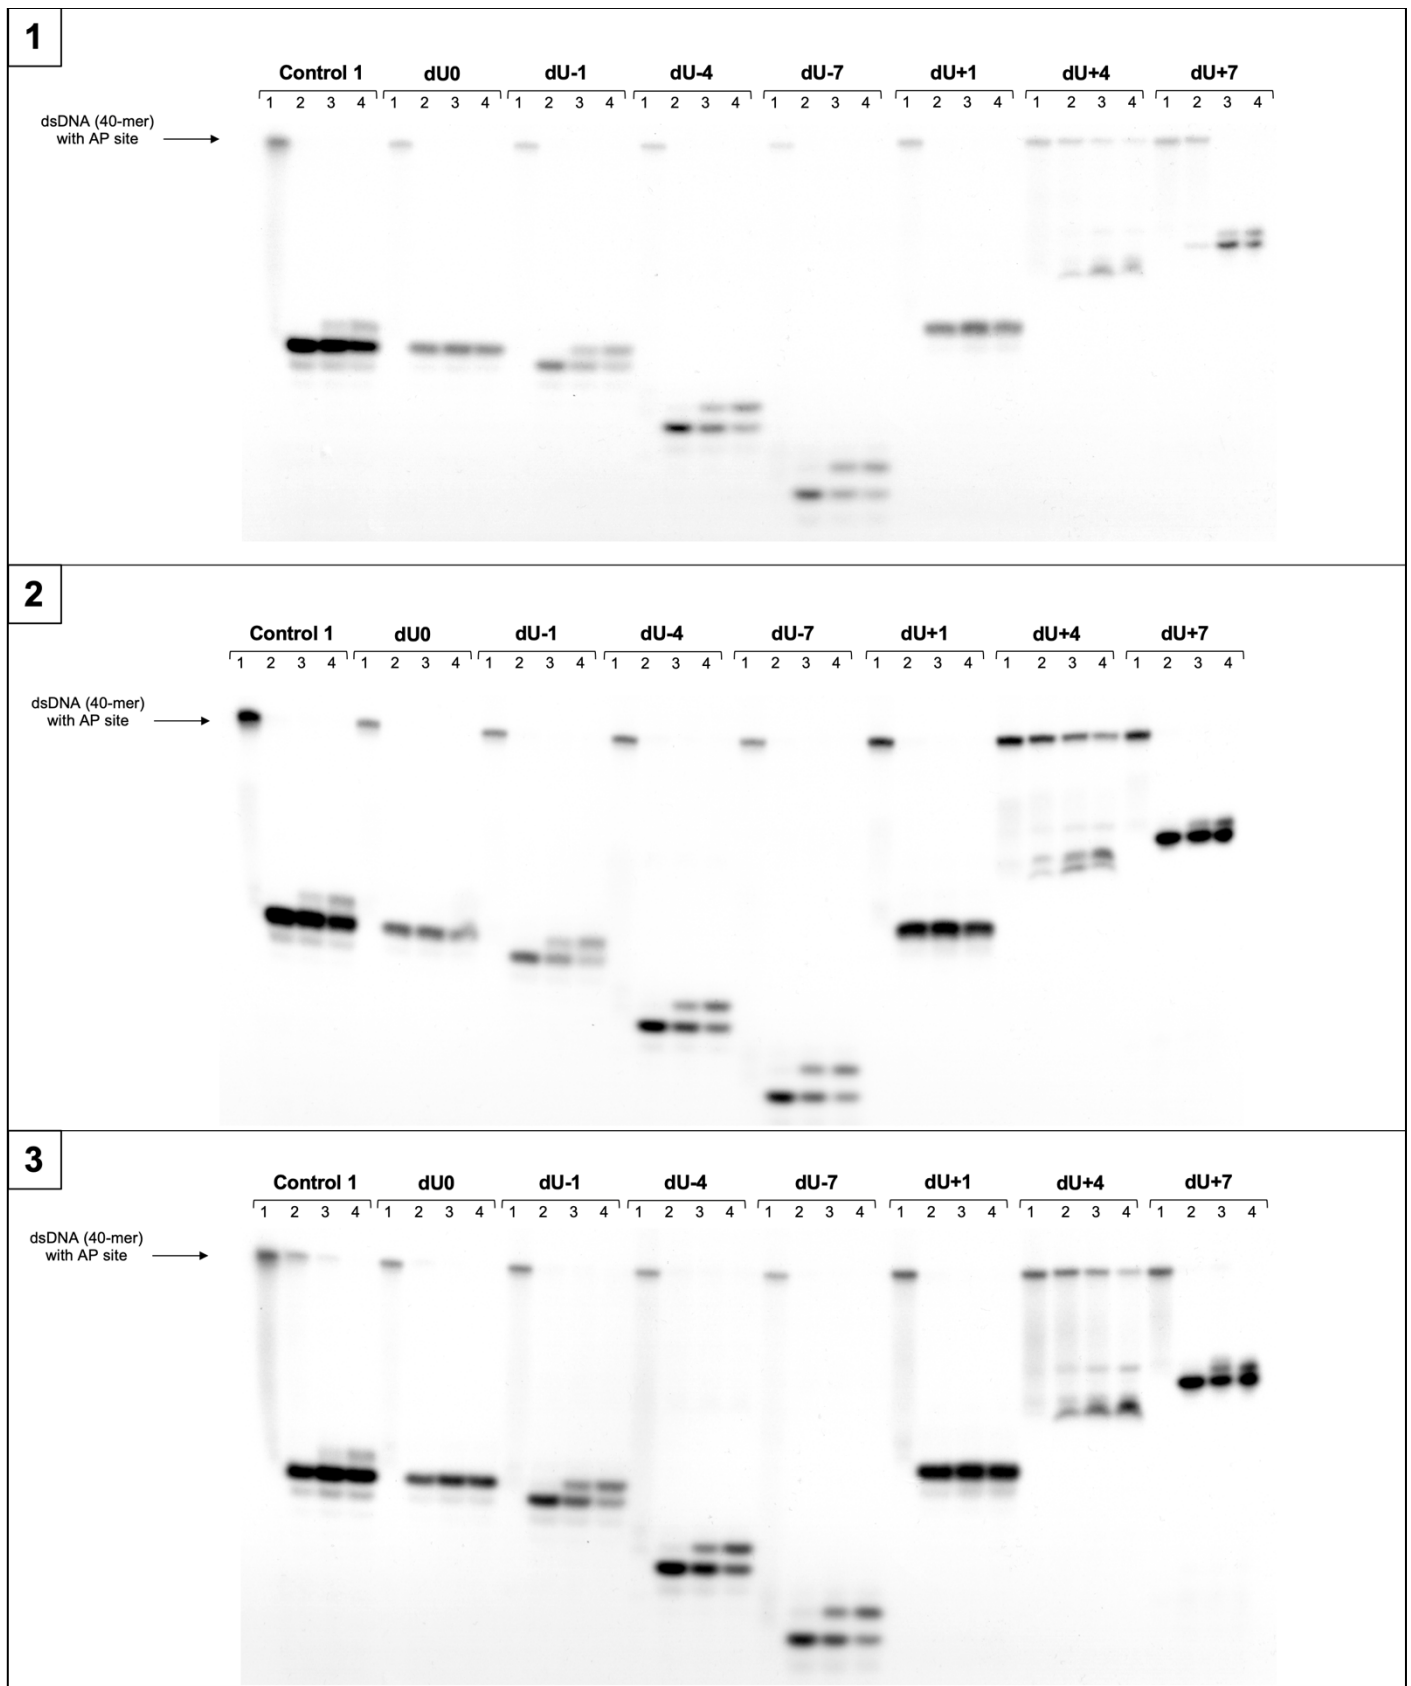

**Figure S3.** The autoradiograms of denaturing PAGE presenting dsDNA containing clustered damage with AP site in one strand and **RcdA** in the opposing strand. Each lane number indicates different assay time: lane 1 - 0 min; lane 2 - 30 min; lane 3 - 3h; lane 4 - 6h. Three experimental replications are presented.

**Table S4.** Endonuclease activity – ScdA and RcdA. Raw numerical data of densitometry obtained from Quantity One software.

| RcdA   |          | Time [h]                  |        |       |       | ScdA   |          | Time [h]                  |       |       |       |
|--------|----------|---------------------------|--------|-------|-------|--------|----------|---------------------------|-------|-------|-------|
|        |          | 0                         | 0,5    | 3     | 6     |        |          | 0                         | 0,5   | 3     | 6     |
| Strand | Data set | Endonuclease activity [%] |        |       |       | Strand | Data set | Endonuclease activity [%] |       |       |       |
| dU0    | 1.       | 7,61                      | 86,52  | 89,54 | 90,68 | dU0    | 1.       | 2,41                      | 88,36 | 87,17 | 86,87 |
|        | 2.       | 4,81                      | 98,53  | 96,19 | 99,53 |        | 2.       | 1,44                      | 77,19 | 77,40 | 75,55 |
|        | 3.       | 3,20                      | 91,53  | 88,33 | 87,08 |        | 3.       | 2,14                      | 79,23 | 77,70 | 77,85 |
|        | Avg      | 5,21                      | 92,19  | 91,36 | 92,43 |        | Avg      | 2,00                      | 81,60 | 80,76 | 80,09 |
|        | SD       | 2,23                      | 6,03   | 4,23  | 6,41  |        | SD       | 0,50                      | 5,95  | 5,56  | 5,98  |
| dU-1   | 1.       | 0,00                      | 87,13  | 62,86 | 45,04 | dU-1   | 1.       | 3,56                      | 88,02 | 65,01 | 45,92 |
|        | 2.       | 3,74                      | 99,08  | 63,51 | 41,13 |        | 2.       | 1,05                      | 80,86 | 64,94 | 47,48 |
|        | 3.       | 3,22                      | 81,02  | 56,42 | 38,95 |        | 3.       | 2,88                      | 71,05 | 60,36 | 45,25 |
|        | Avg      | 2,32                      | 89,08  | 60,93 | 41,71 |        | Avg      | 2,49                      | 79,98 | 63,44 | 46,22 |
|        | SD       | 2,02                      | 9,19   | 3,92  | 3,09  |        | SD       | 1,30                      | 8,52  | 2,66  | 1,14  |
| dU-4   | 1.       | 0,73                      | 95,03  | 57,62 | 51,65 | dU-4   | 1.       | 0,67                      | 89,55 | 70,80 | 54,20 |
|        | 2.       | 0,00                      | 93,20  | 67,45 | 42,47 |        | 2.       | 3,06                      | 87,27 | 70,39 | 53,73 |
|        | 3.       | 0,74                      | 82,65  | 64,73 | 45,40 |        | 3.       | 2,71                      | 88,65 | 67,32 | 46,49 |
|        | Avg      | 0,49                      | 90,29  | 63,27 | 46,51 |        | Avg      | 2,15                      | 88,49 | 69,51 | 51,47 |
|        | SD       | 0,43                      | 6,68   | 5,07  | 4,69  |        | SD       | 1,29                      | 1,15  | 1,90  | 4,32  |
| dU-7   | 1.       | 0,00                      | 95,96  | 63,85 | 36,73 | dU-7   | 1.       | 0,00                      | 90,35 | 64,23 | 49,59 |
|        | 2.       | 0,00                      | 91,19  | 51,46 | 37,67 |        | 2.       | 0,96                      | 96,02 | 68,46 | 47,22 |
|        | 3.       | 4,12                      | 84,93  | 57,76 | 37,93 |        | 3.       | 0,91                      | 90,48 | 70,07 | 45,66 |
|        | Avg      | 1,37                      | 90,69  | 57,69 | 37,44 |        | Avg      | 0,62                      | 92,28 | 67,59 | 47,49 |
|        | SD       | 2,38                      | 5,53   | 6,20  | 0,63  |        | SD       | 0,54                      | 3,23  | 3,01  | 1,98  |
| dU+1   | 1.       | 0,00                      | 92,47  | 93,24 | 93,30 | dU+1   | 1.       | 0,78                      | 81,26 | 80,73 | 67,58 |
|        | 2.       | 0,31                      | 92,08  | 89,43 | 90,11 |        | 2.       | 0,52                      | 90,49 | 88,68 | 87,66 |
|        | 3.       | 2,83                      | 86,40  | 80,96 | 83,67 |        | 3.       | 1,79                      | 83,76 | 81,79 | 82,84 |
|        | Avg      | 1,05                      | 90,32  | 87,88 | 89,03 |        | Avg      | 1,03                      | 85,17 | 83,73 | 79,36 |
|        | SD       | 1,55                      | 3,40   | 6,28  | 4,91  |        | SD       | 0,67                      | 4,77  | 4,32  | 10,48 |
| dU+4   | 1.       | 0,00                      | 25,71  | 61,62 | 73,62 | dU+4   | 1.       | 1,27                      | 32,49 | 65,11 | 57,37 |
|        | 2.       | 7,21                      | 40,17  | 69,62 | 56,70 |        | 2.       | 0,10                      | 31,21 | 82,32 | 67,64 |
|        | 3.       | 2,19                      | 29,95  | 48,10 | 62,93 |        | 3.       | 0,91                      | 33,91 | 48,46 | 59,19 |
|        | Avg      | 3,13                      | 31,94  | 59,78 | 64,41 |        | Avg      | 0,76                      | 32,53 | 65,30 | 61,40 |
|        | SD       | 3,69                      | 7,44   | 10,88 | 8,56  |        | SD       | 0,60                      | 1,35  | 16,93 | 5,48  |
| dU+7   | 1.       | 0,34                      | 87,41  | 80,41 | 72,03 | dU+7   | 1.       | 0,59                      | 80,00 | 64,00 | 59,18 |
|        | 2.       | 2,91                      | 26,95* | 79,84 | 60,60 |        | 2.       | 0,44                      | 87,73 | 74,19 | 74,76 |
|        | 3.       | 1,68                      | 78,77  | 66,97 | 63,10 |        | 3.       | 0,64                      | 76,63 | 72,02 | 57,54 |
|        | Avg      | 1,64                      | 83,09  | 75,74 | 65,24 |        | Avg      | 0,56                      | 81,45 | 70,07 | 63,82 |
|        | SD       | 1,29                      | 6,11   | 7,60  | 6,01  |        | SD       | 0,10                      | 5,69  | 5,37  | 9,50  |

\* Rejected values

**Table S5.** Polymerase activity – ScdA and RcdA. Raw numerical data of densitometry obtained from Quantity One software.

| RcdA   |          | Time [h]                |       |       |       | ScdA   |          | Time [h]                |       |       |       |
|--------|----------|-------------------------|-------|-------|-------|--------|----------|-------------------------|-------|-------|-------|
|        |          | 0                       | 0,5   | 3     | 6     |        |          | 0                       | 0,5   | 3     | 6     |
| Strand | Data set | Polymerase activity [%] |       |       |       | Strand | Data set | Polymerase activity [%] |       |       |       |
| dU0    | 1.       | 0,00                    | 0,00  | 0,35  | 0,21  | dU0    | 1.       | 0,32                    | 2,87  | 2,90  | 3,66  |
|        | 2.       | 0,00                    | 0,00  | 0,00  | 0,00  |        | 2.       | 1,54                    | 8,52  | 7,47  | 7,15  |
|        | 3.       | 3,12*                   | 0,00  | 1,31  | 2,91  |        | 3.       | 0,13                    | 6,68  | 7,33  | 6,79  |
|        | Avg      | 0,00                    | 0,00  | 0,55  | 1,04  |        | Avg      | 0,66                    | 6,02  | 5,90  | 5,87  |
|        | SD       | 0,00                    | 0,00  | 0,68  | 1,62  |        | SD       | 0,77                    | 2,88  | 2,60  | 1,92  |
| dU-1   | 1.       | 0,00                    | 3,73  | 30,12 | 49,29 | dU-1   | 1.       | 0,42                    | 4,56  | 30,46 | 50,70 |
|        | 2.       | 0,00                    | 0,00  | 36,19 | 57,94 |        | 2.       | 0,86                    | 5,70  | 25,38 | 46,47 |
|        | 3.       | 0,00                    | 6,30  | 34,10 | 52,86 |        | 3.       | 1,11                    | 8,38  | 31,89 | 49,70 |
|        | Avg      | 0,00                    | 3,34  | 33,47 | 53,36 |        | Avg      | 0,80                    | 6,21  | 29,24 | 48,95 |
|        | SD       | 0,00                    | 3,17  | 3,08  | 4,35  |        | SD       | 0,35                    | 1,96  | 3,42  | 2,21  |
| dU-4   | 1.       | 0,00                    | 1,55  | 38,17 | 45,40 | dU-4   | 1.       | 0,90                    | 2,70  | 24,24 | 42,55 |
|        | 2.       | 0,00                    | 0,00  | 27,19 | 54,04 |        | 2.       | 0,66                    | 3,00  | 25,33 | 43,93 |
|        | 3.       | 0,00                    | 7,10  | 27,82 | 48,87 |        | 3.       | 2,97                    | 4,98  | 28,10 | 49,66 |
|        | Avg      | 0,00                    | 2,88  | 31,06 | 49,43 |        | Avg      | 1,51                    | 3,56  | 25,89 | 45,38 |
|        | SD       | 0,00                    | 3,74  | 6,17  | 4,35  |        | SD       | 1,27                    | 1,24  | 1,99  | 3,77  |
| dU-7   | 1.       | 0,00                    | 0,00  | 32,73 | 58,42 | dU-7   | 1.       | 0,01                    | 3,33  | 31,98 | 47,54 |
|        | 2.       | 0,00                    | 5,12  | 45,94 | 58,37 |        | 2.       | 0,00                    | 1,60  | 29,74 | 51,25 |
|        | 3.       | 0,00                    | 6,34  | 33,68 | 54,37 |        | 3.       | 1,75                    | 3,22  | 25,10 | 50,76 |
|        | Avg      | 0,00                    | 3,82  | 37,45 | 57,05 |        | Avg      | 0,59                    | 2,72  | 28,94 | 49,85 |
|        | SD       | 0,00                    | 3,36  | 7,37  | 2,32  |        | SD       | 1,01                    | 0,97  | 3,51  | 2,02  |
| dU+1   | 1.       | 0,00                    | 0,00  | 0,00  | 0,00  | dU+1   | 1.       | 0,33                    | 10,39 | 11,30 | 21,02 |
|        | 2.       | 0,00                    | 0,00  | 0,42  | 0,39  |        | 2.       | 0,00                    | 5,03  | 2,41  | 3,04  |
|        | 3.       | 0,00                    | 2,67  | 1,89  | 1,15  |        | 3.       | 0,00                    | 9,27  | 12,35 | 9,56  |
|        | Avg      | 0,00                    | 0,89  | 0,77  | 0,51  |        | Avg      | 0,11                    | 8,23  | 8,69  | 11,21 |
|        | SD       | 0,00                    | 1,54  | 1,00  | 0,58  |        | SD       | 0,19                    | 2,83  | 5,46  | 9,10  |
| dU+4   | 1.       | 8,18*                   | 4,33  | 4,30  | 4,54  | dU+4   | 1.       | 0,02                    | 0,13  | 22,57 | 29,00 |
|        | 2.       | 0,66                    | 12,15 | 14,27 | 28,59 |        | 2.       | 0,02                    | 4,48  | 12,01 | 16,42 |
|        | 3.       | 0,41                    | 19,59 | 24,36 | 19,79 |        | 3.       | 0,10                    | 11,82 | 17,86 | 24,27 |
|        | Avg      | 0,54                    | 12,02 | 14,31 | 17,64 |        | Avg      | 0,05                    | 5,48  | 17,48 | 23,23 |
|        | SD       | 0,18                    | 7,63  | 10,03 | 12,17 |        | SD       | 0,04                    | 5,91  | 5,29  | 6,35  |
| dU+7   | 1.       | 2,41                    | 1,25  | 14,82 | 22,23 | dU+7   | 1.       | 0,26                    | 18,49 | 33,96 | 39,46 |
|        | 2.       | 1,98                    | 5,72  | 17,34 | 37,97 |        | 2.       | 0,32                    | 8,08  | 16,15 | 13,24 |
|        | 3.       | 0,46                    | 14,64 | 25,45 | 32,31 |        | 3.       | 2,46                    | 16,21 | 18,78 | 34,44 |
|        | Avg      | 1,62                    | 7,20  | 19,20 | 30,84 |        | Avg      | 1,02                    | 14,26 | 22,97 | 29,05 |
|        | SD       | 1,03                    | 6,82  | 5,55  | 7,97  |        | SD       | 1,25                    | 5,47  | 9,61  | 13,92 |

\* Rejected values



A.

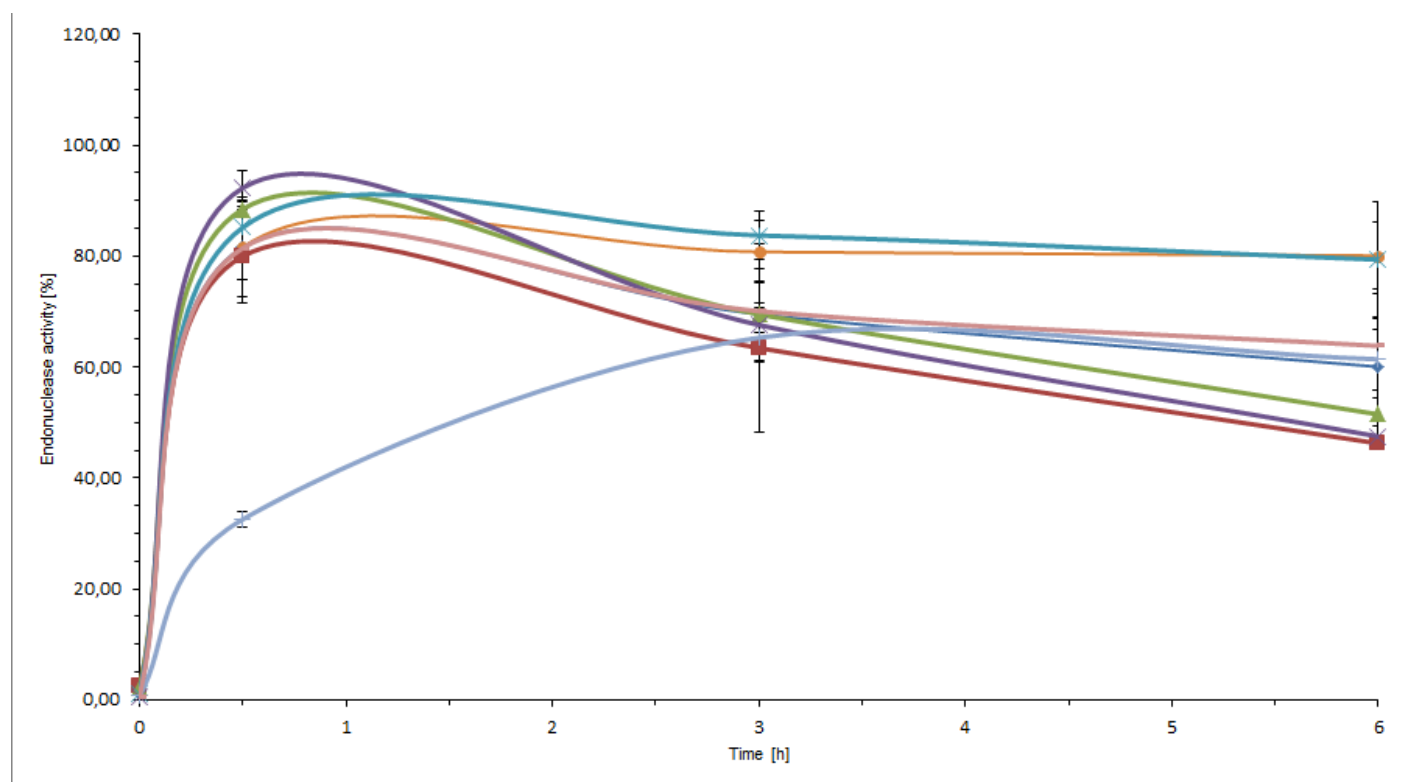

B.

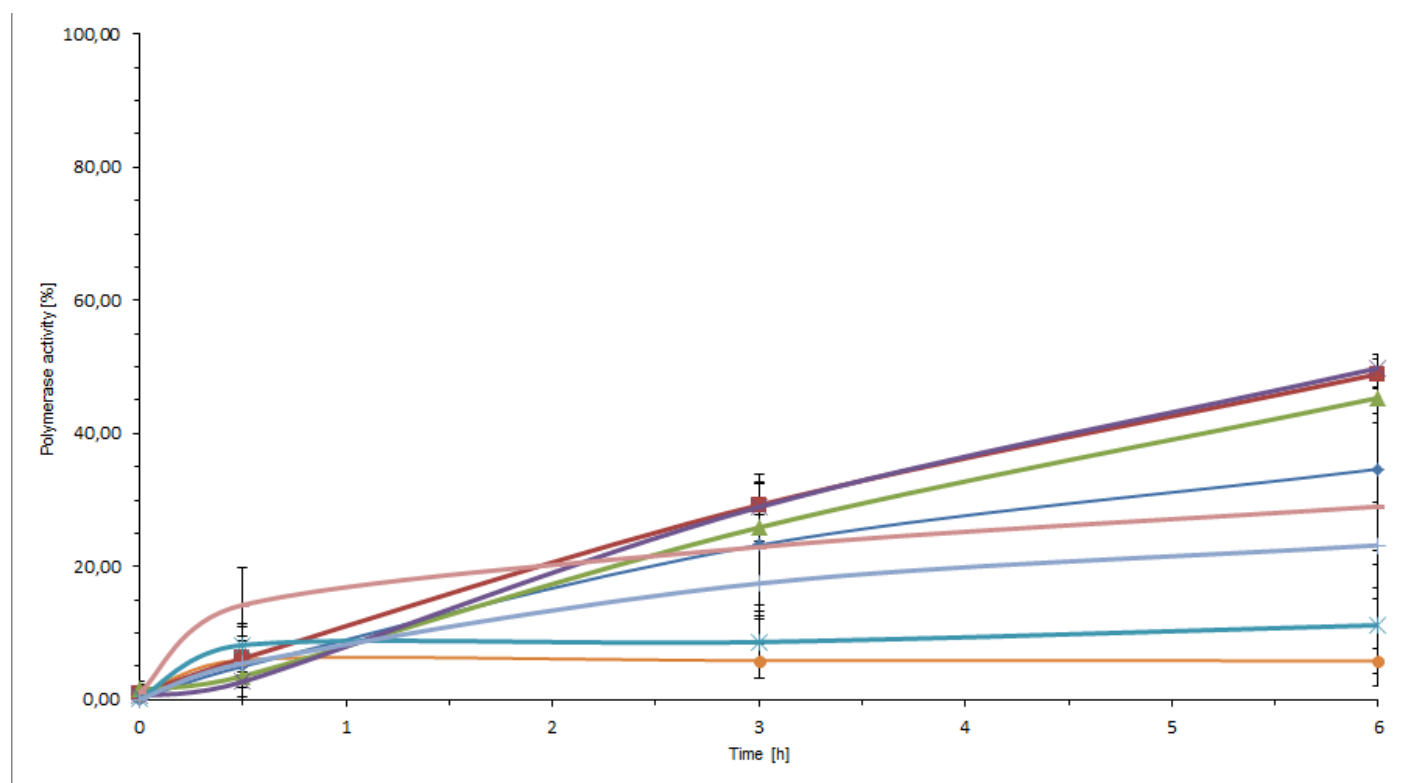

C.

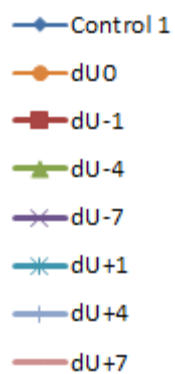

**Figure S4.** Graphical representation of the results for ScdA. (A) endonuclease activity +SD, (B) polymerase activity + SD; (C) figure legend.

A.

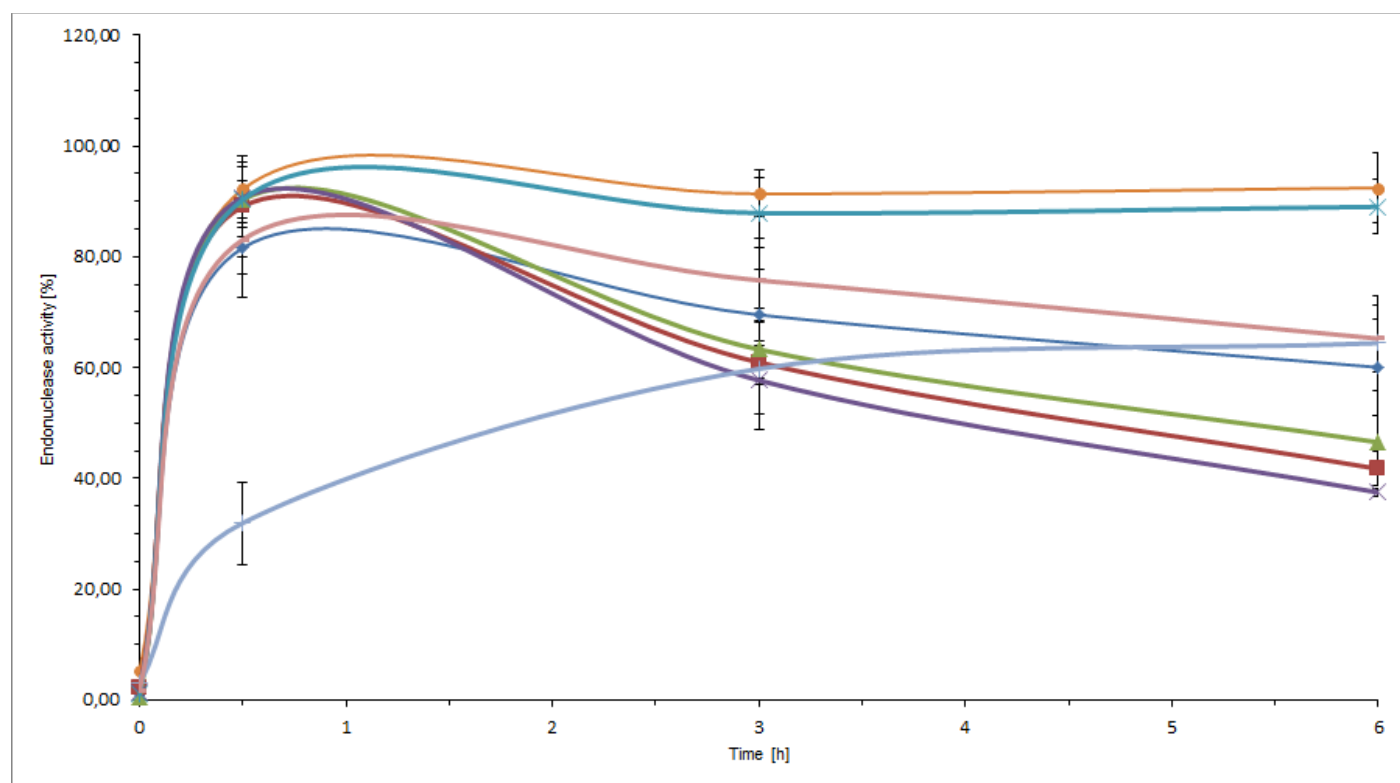

B.

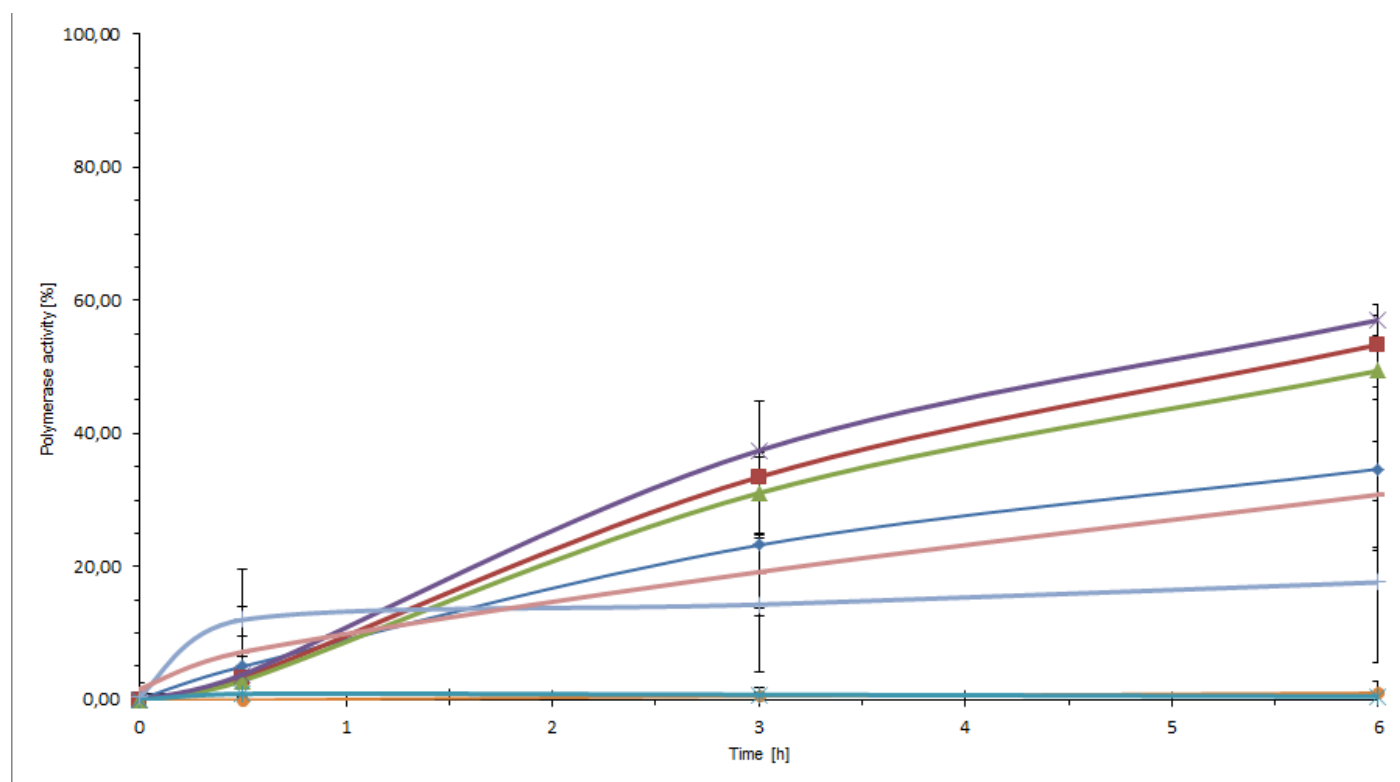

C.

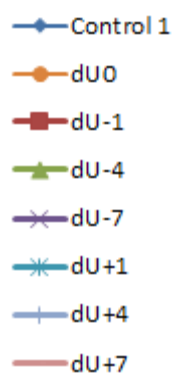

**Figure S5.** Graphical representation of the results for RcdA. (A) endonuclease activity +SD, (B) polymerase activity + SD; (C) figure legend.

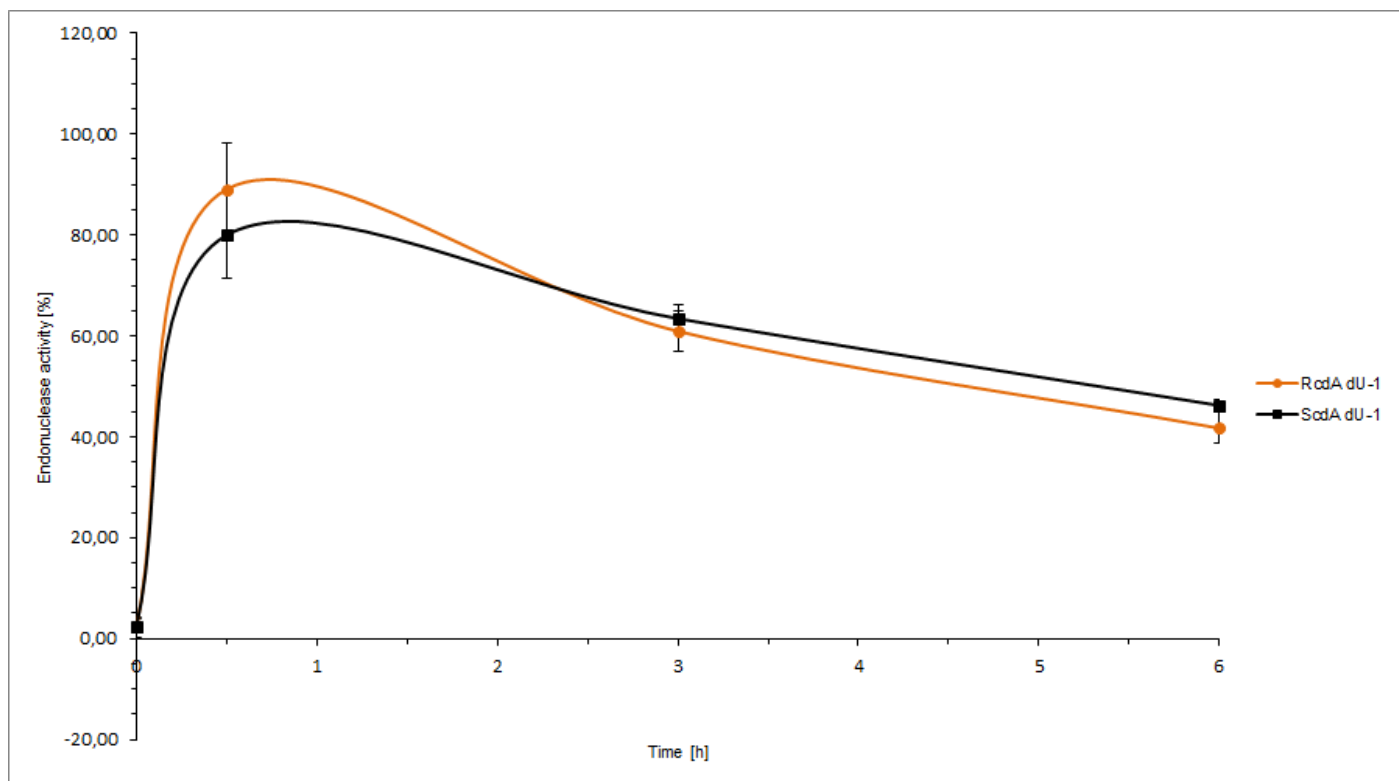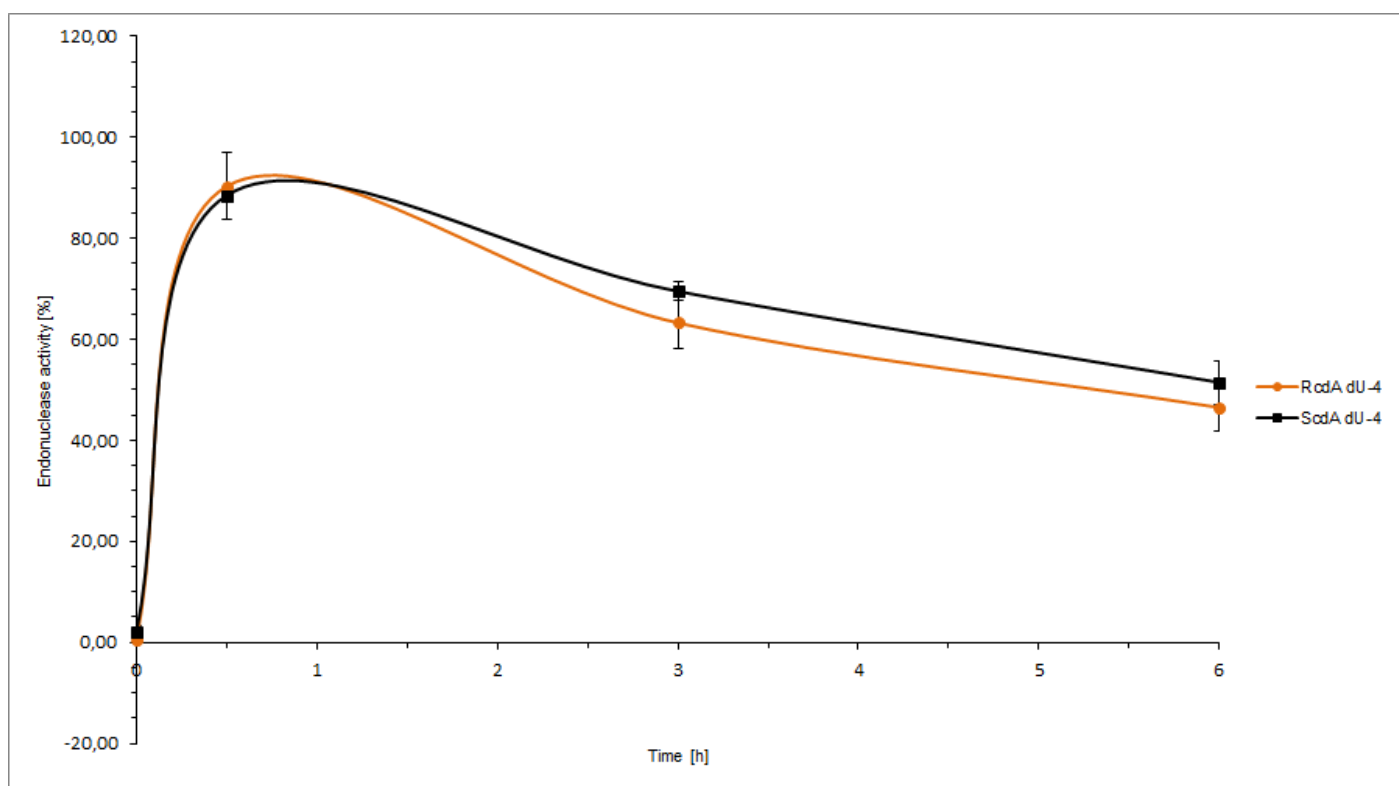

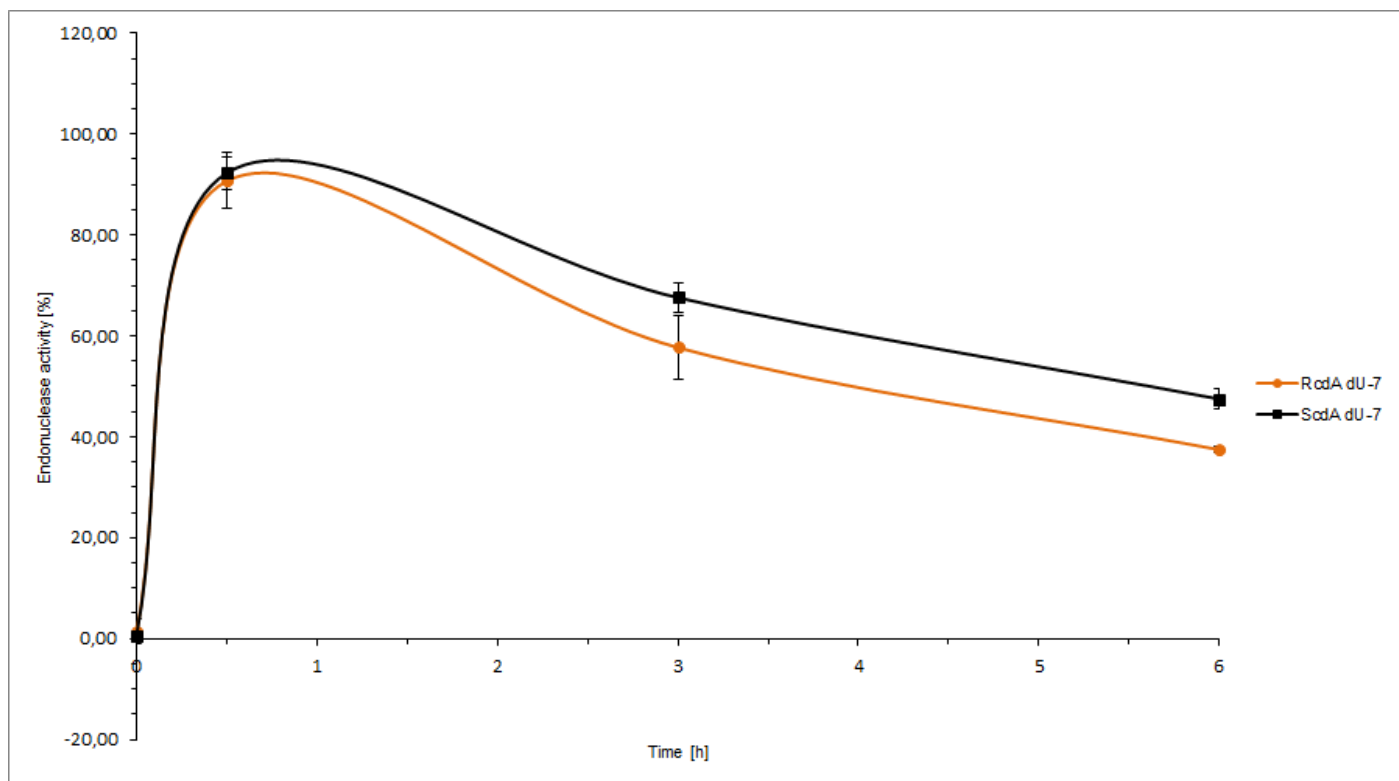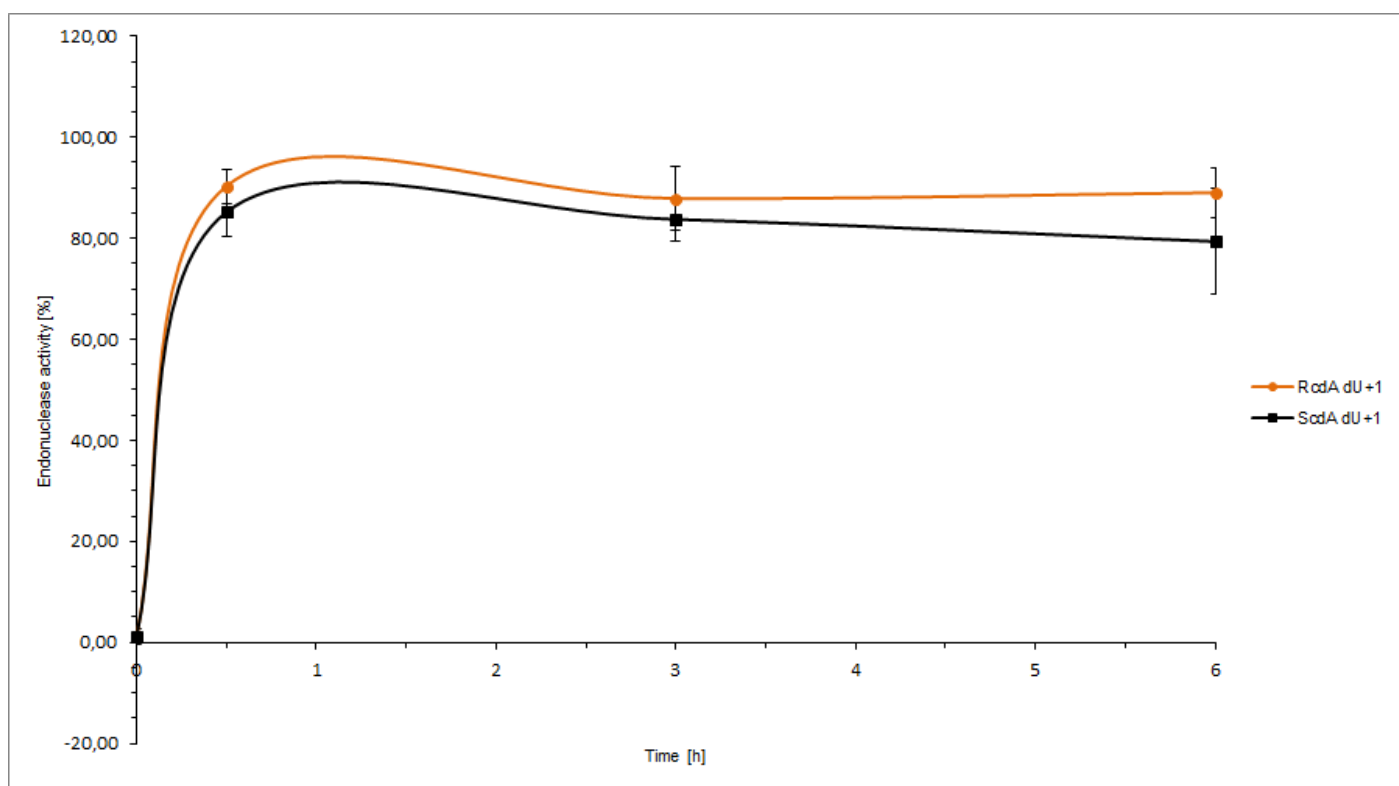

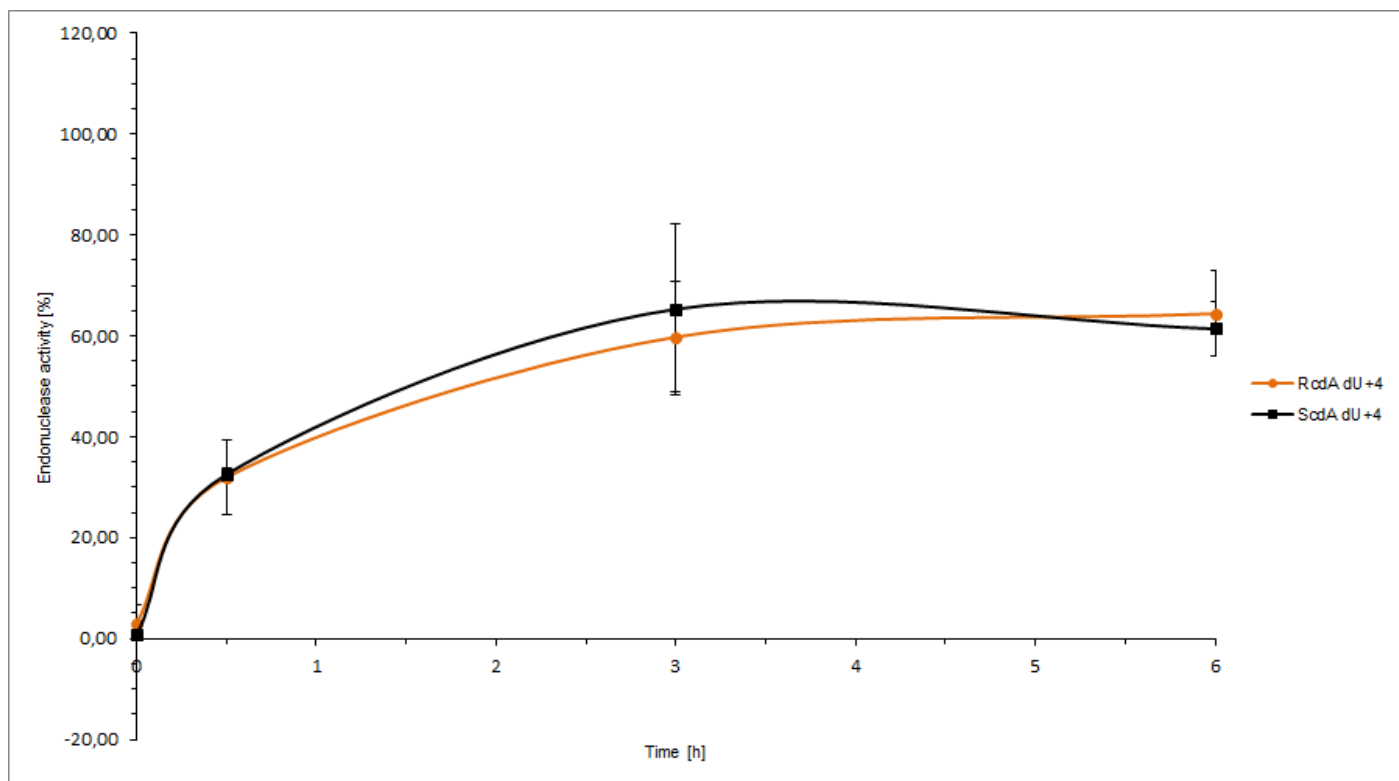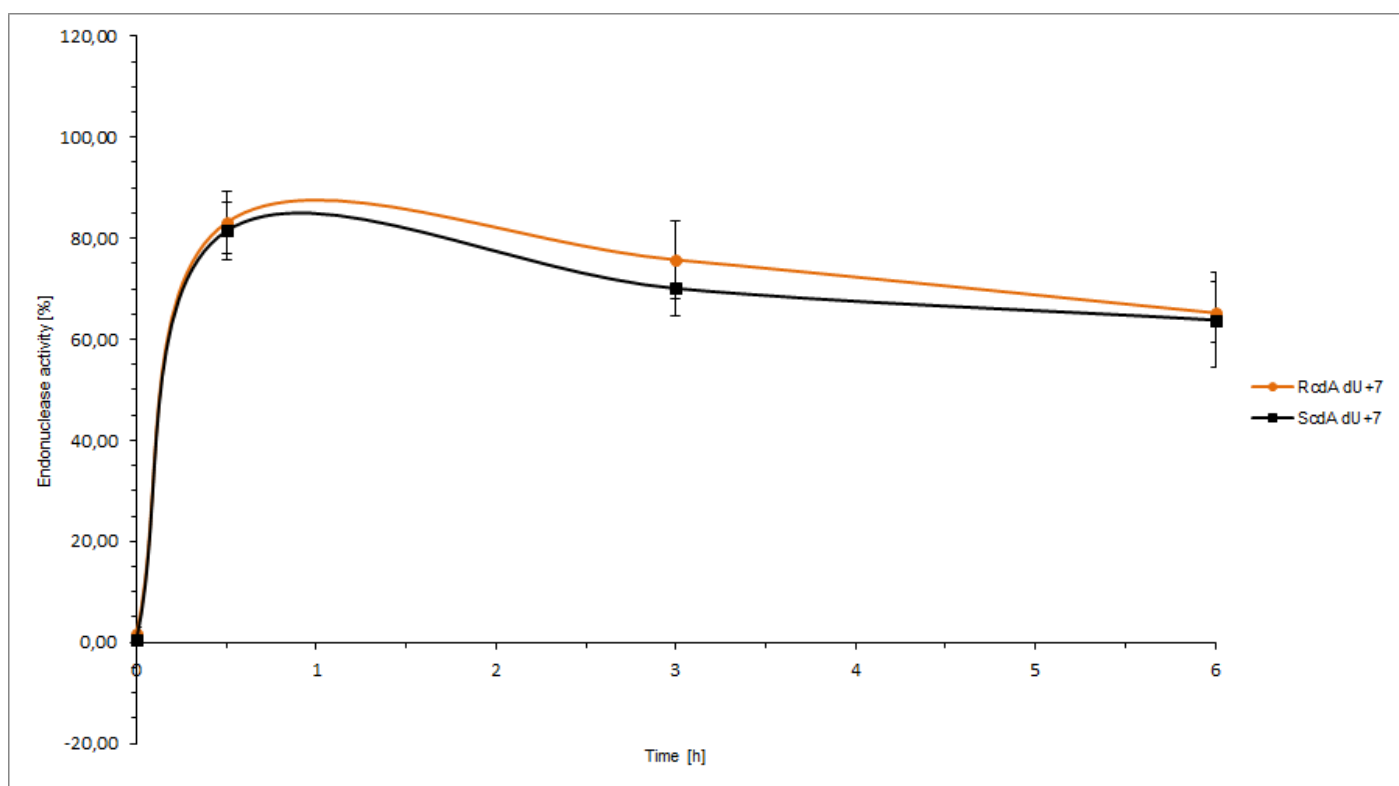

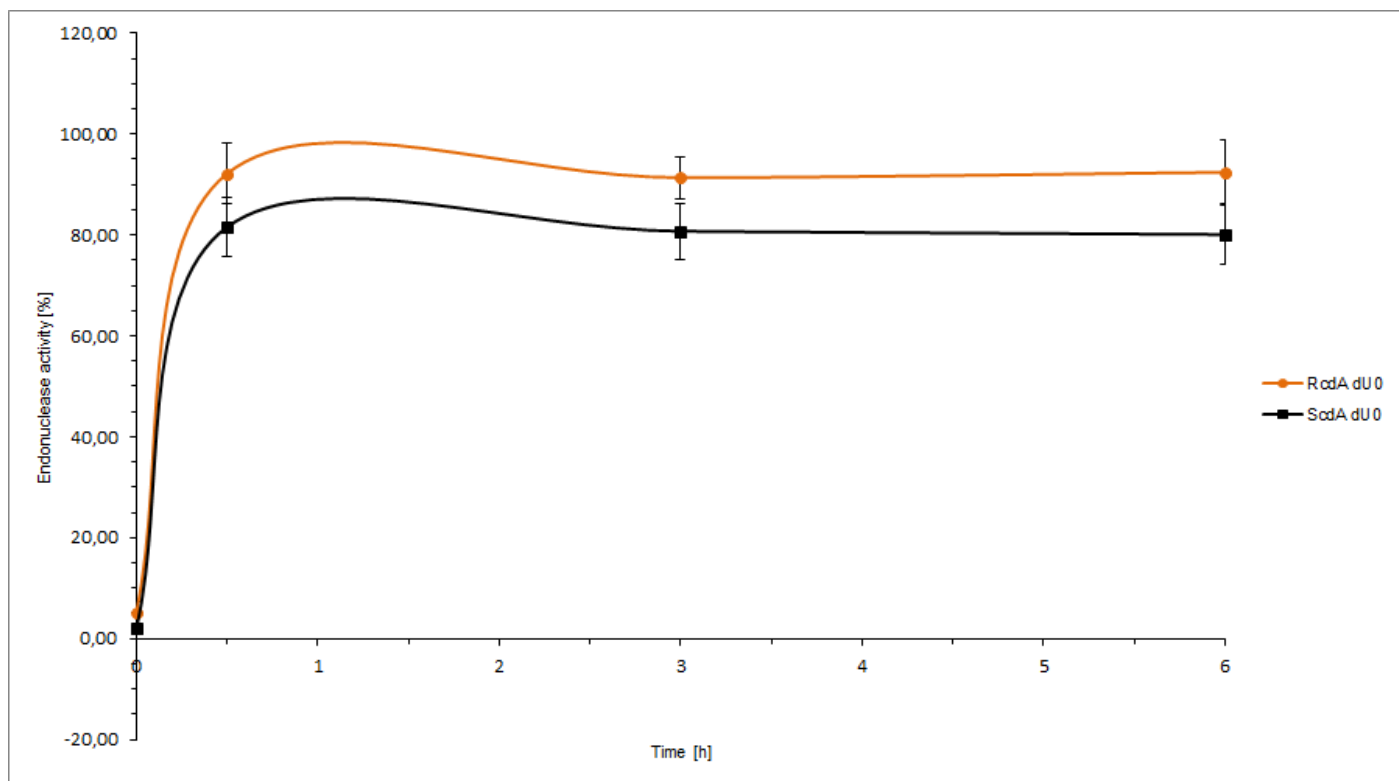

**Figure S6.** Endonuclease activity [%] of ScdA vs. RcdA – comparison of individual strands.

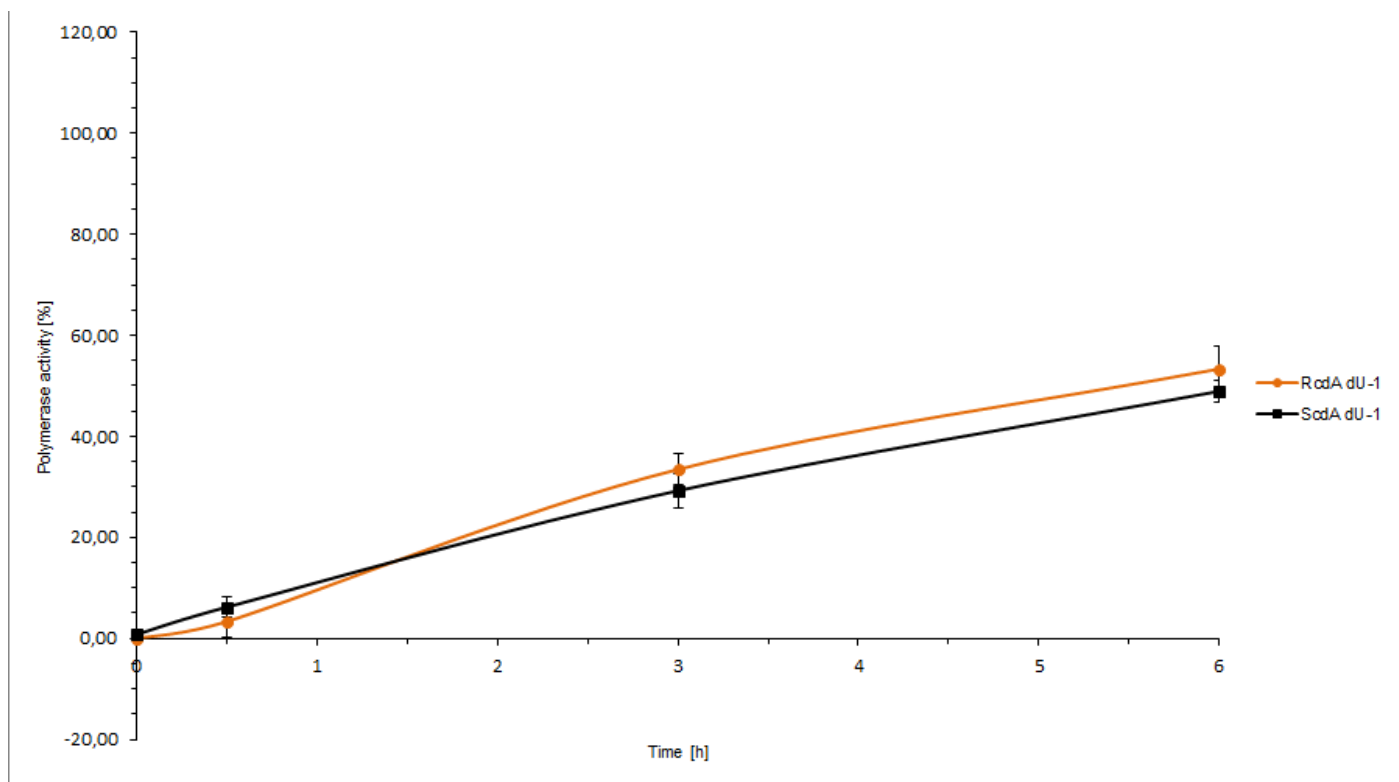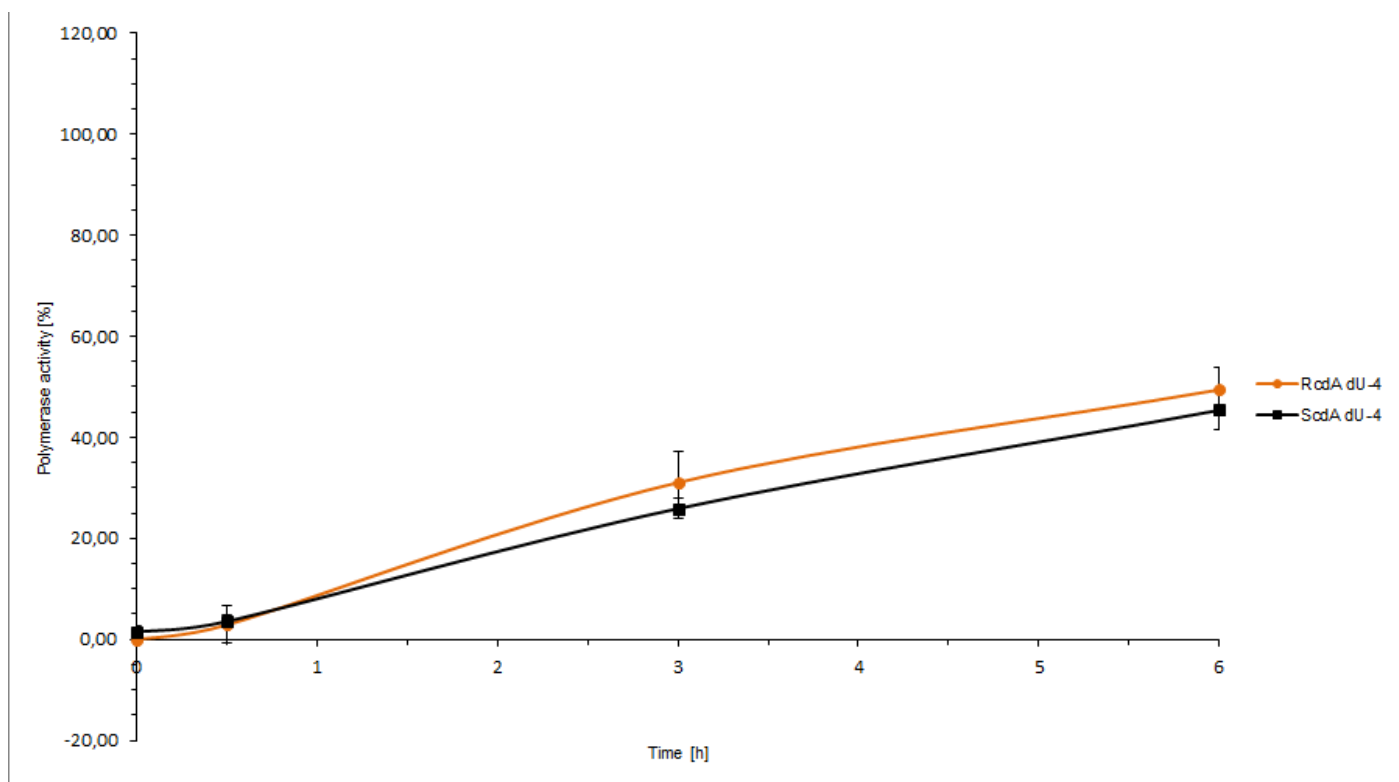



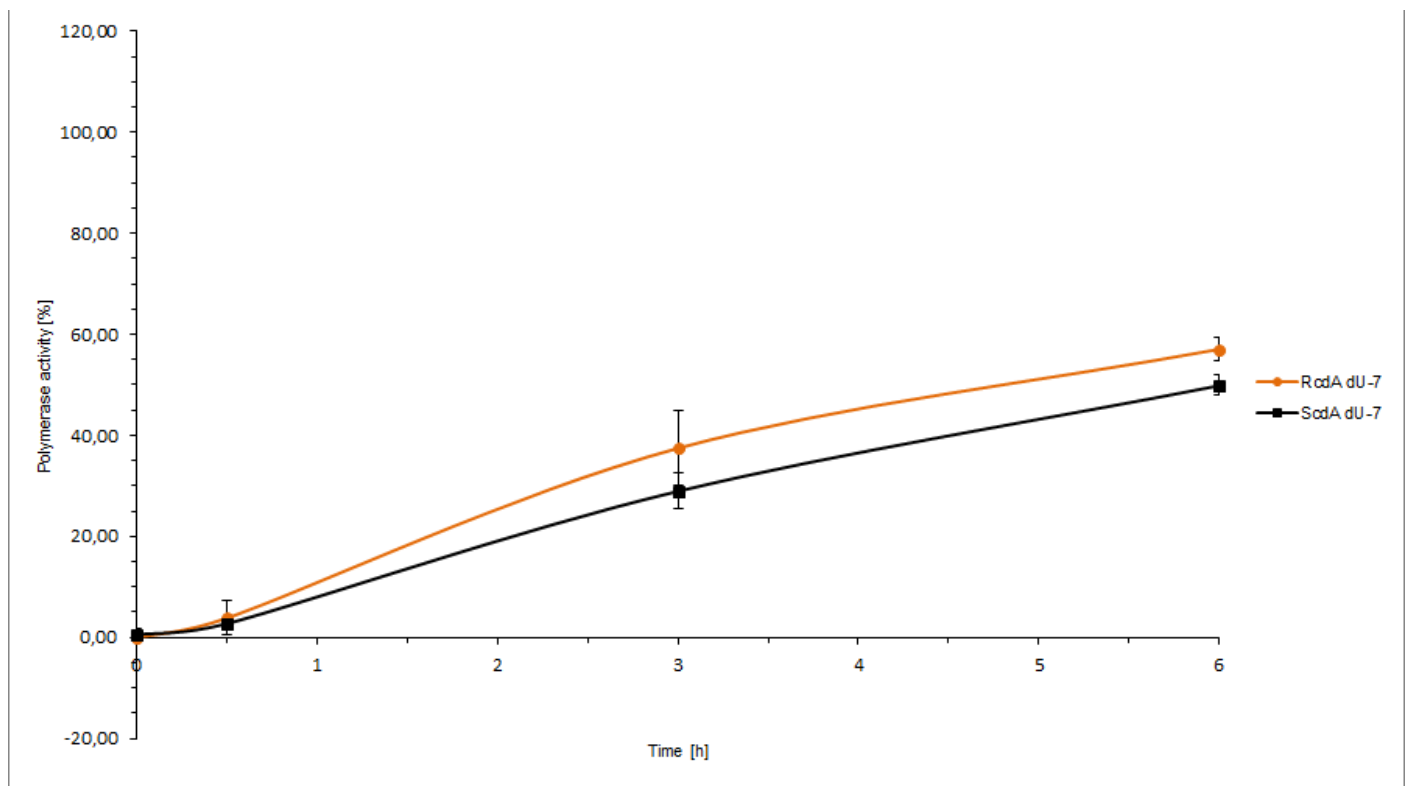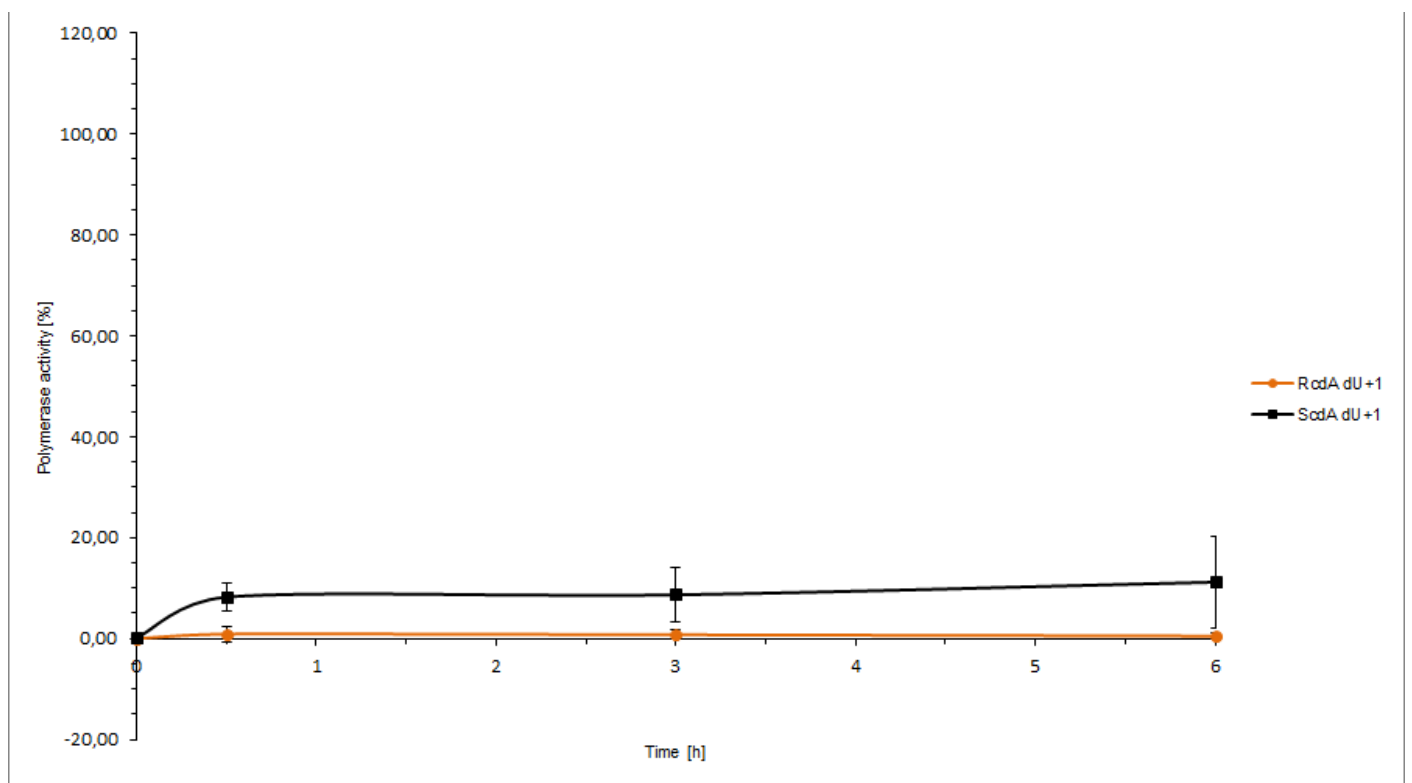

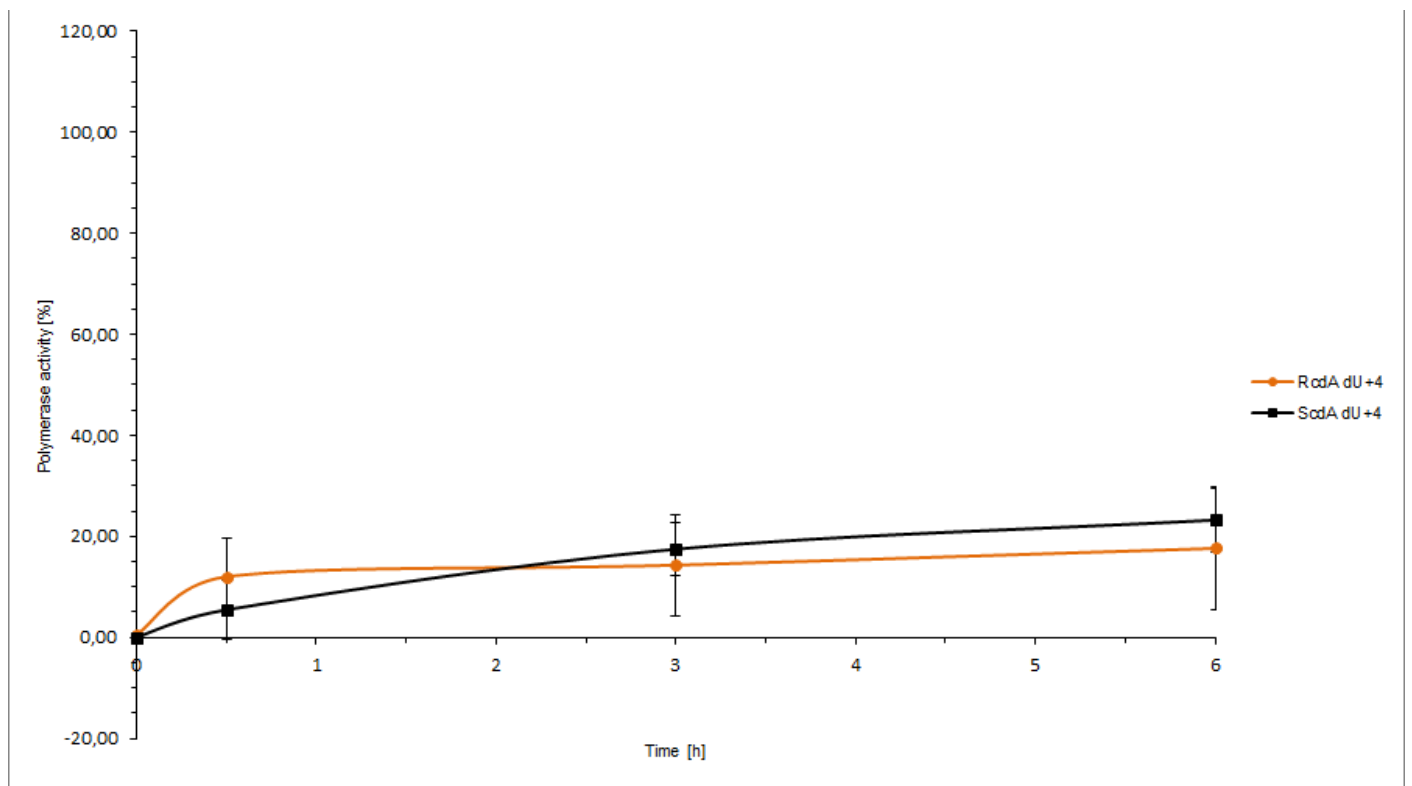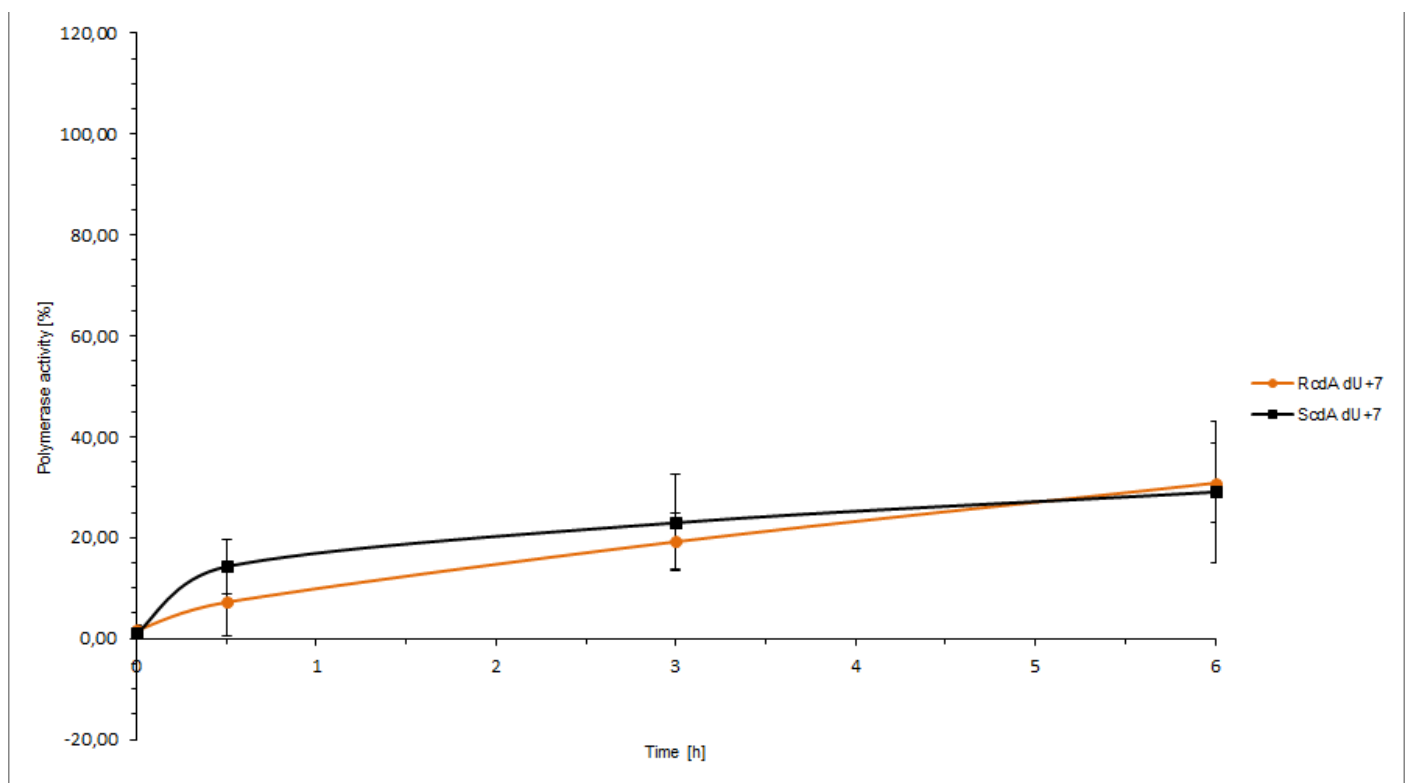

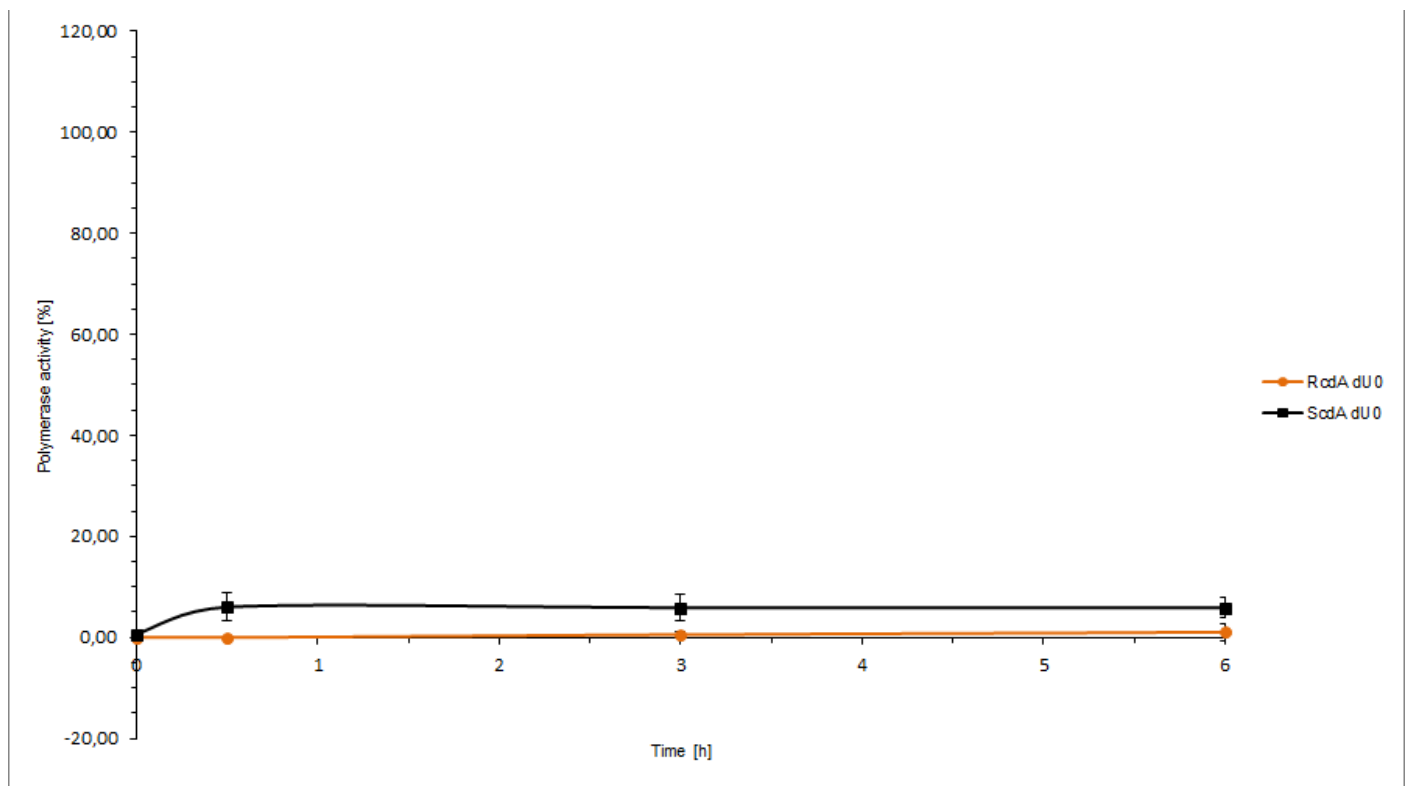

**Figure S7.** Polymerase activity [%] of ScdA vs. RcdA – comparison of individual strands.

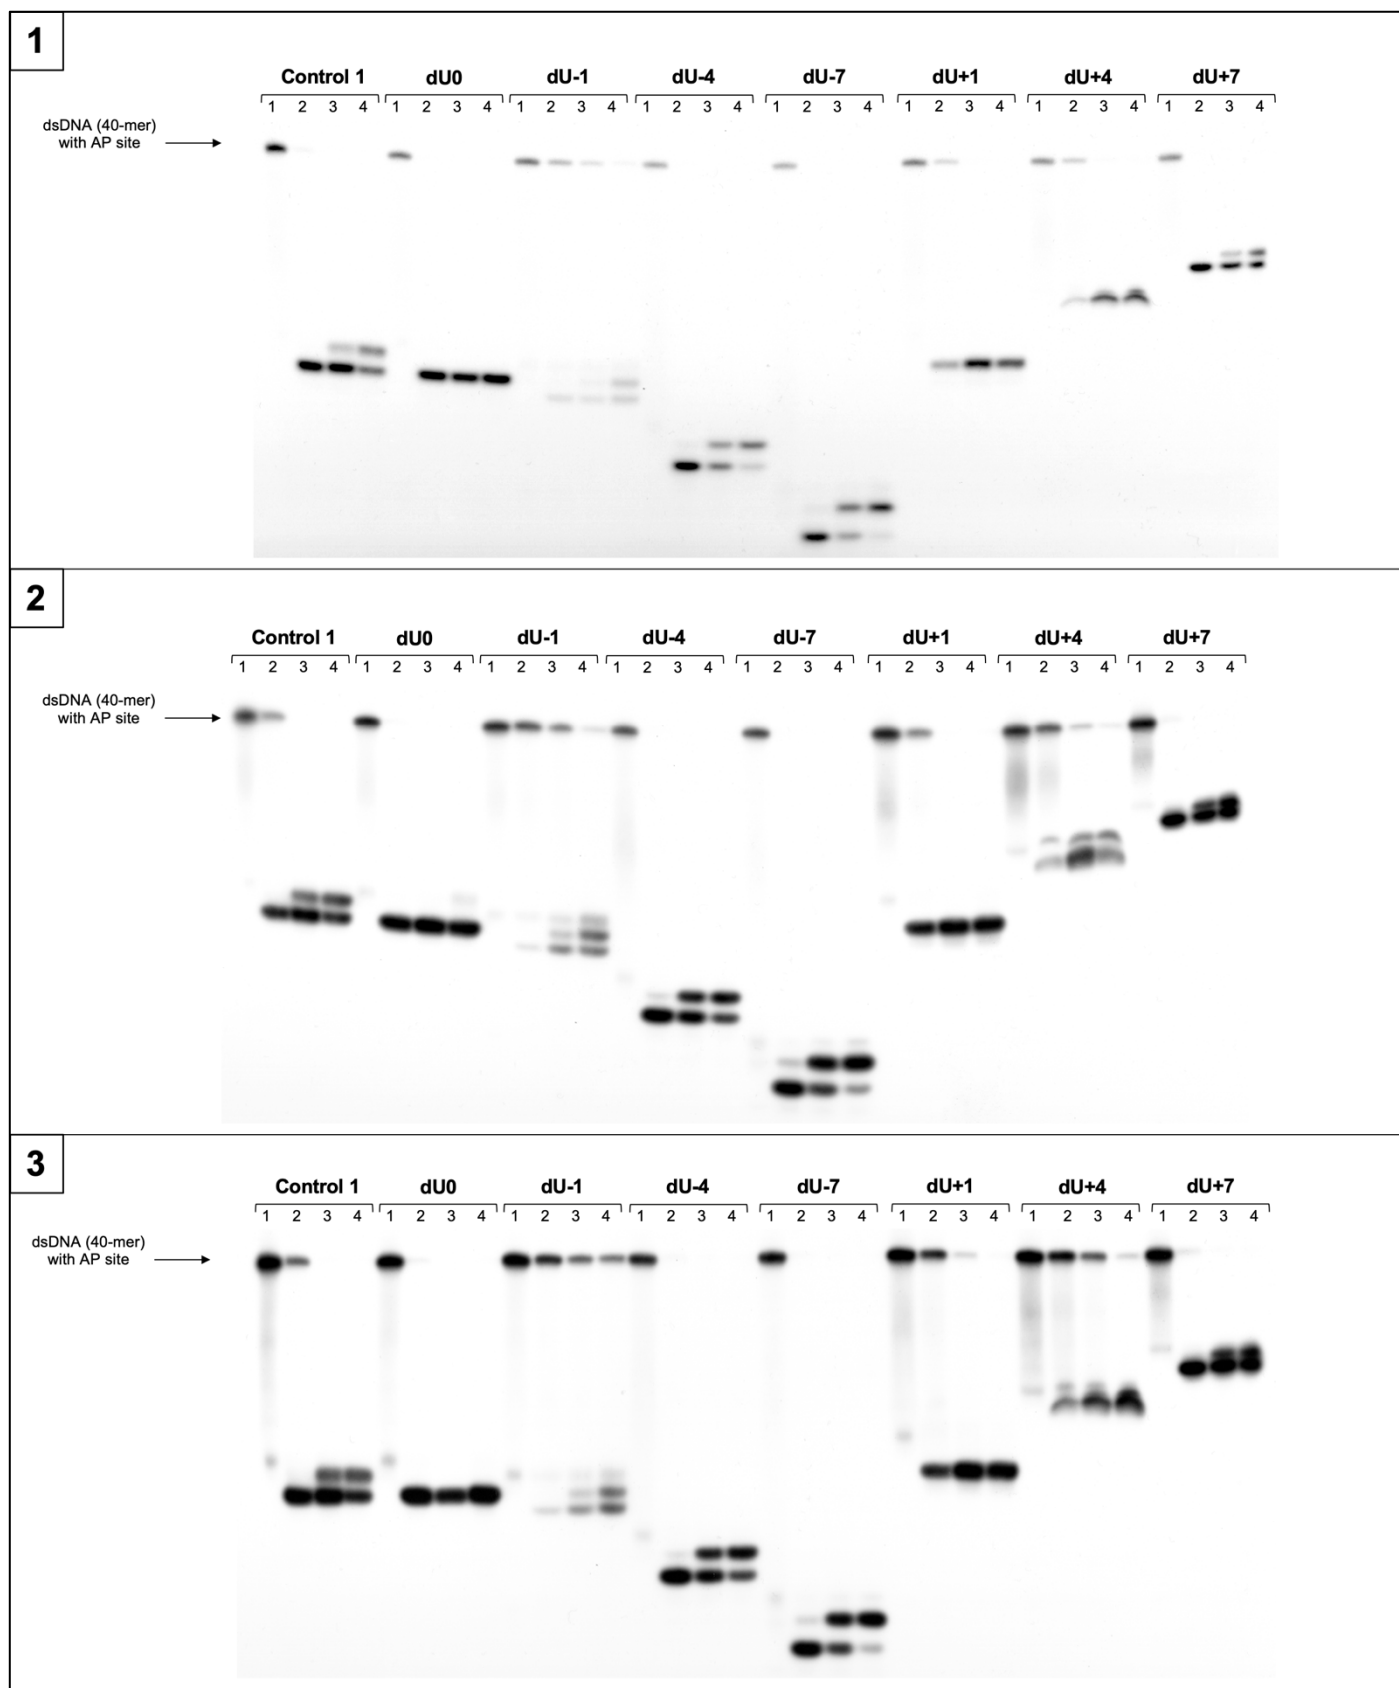

**Figure S8.** The autoradiograms of denaturing PAGE presenting repair of dsDNA containing clustered damage with AP site in one strand and **ScdG** in the opposing strand. Each number indicates different assay time: lane 1 - 0 min; lane 2 - 30 min; lane 3 - 3h; lane 4 - 6h. Three experimental replications are presented.

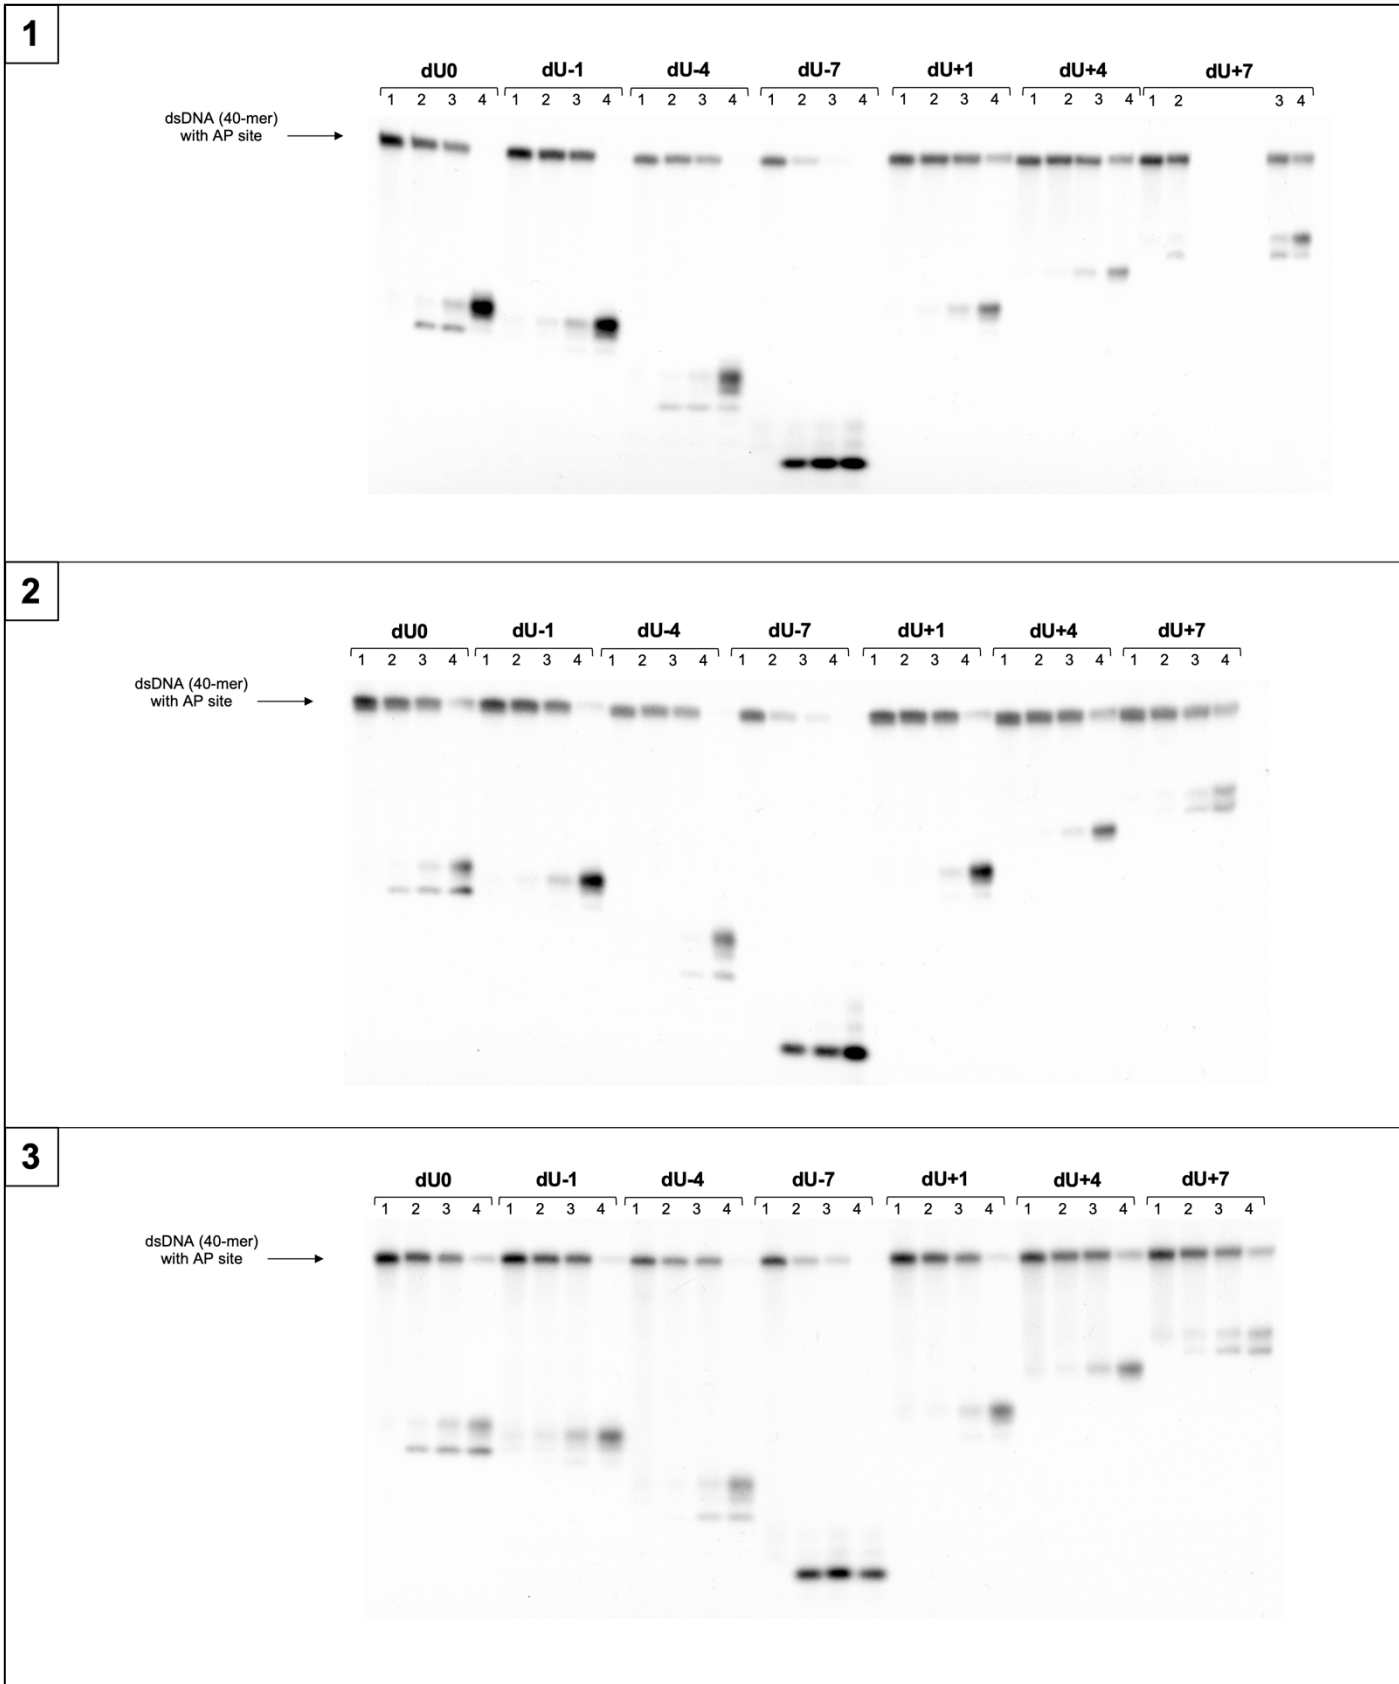

**Figure S9.** The autoradiograms of denaturing PAGE presenting repair of dsDNA containing clustered damage with AP site in one strand and **RcdG** in the opposing strand. Each number indicates different assay time: lane 1 - 0 min; lane 2 - 30 min; lane 3 - 3h; lane 4 - 6h. Three experimental replications are presented.

**Table S6.** Endonuclease activity – ScdG and RcdG. Raw numerical data of densitometry obtained from Quantity One software.

| RcdG   |          | Time [h]                  |       |       |       | ScdG   |          | Time [h]                  |       |       |       |
|--------|----------|---------------------------|-------|-------|-------|--------|----------|---------------------------|-------|-------|-------|
|        |          | 0                         | 0,5   | 3     | 6     |        |          | 0                         | 0,5   | 3     | 6     |
| Strand | Data set | Endonuclease activity [%] |       |       |       | Strand | Data set | Endonuclease activity [%] |       |       |       |
| dU0    | 1.       | 1,34                      | 3,52  | 20,80 | 80,18 | dU0    | 1.       | 0,92                      | 99,54 | 99,53 | 94,41 |
|        | 2.       | 0,15                      | 11,18 | 19,91 | 34,40 |        | 2.       | 0,61                      | 93,19 | 96,39 | 91,56 |
|        | 3.       | 0,29                      | 16,50 | 26,36 | 38,06 |        | 3.       | 0,00                      | 99,82 | 99,91 | 99,87 |
|        | Avg      | 0,59                      | 10,40 | 22,36 | 50,88 |        | Avg      | 0,51                      | 97,51 | 98,61 | 95,28 |
|        | SD       | 0,65                      | 6,52  | 3,49  | 25,44 |        | SD       | 0,47                      | 3,75  | 1,93  | 4,22  |
| dU-1   | 1.       | 0,00                      | 6,45  | 24,32 | 74,24 | dU-1   | 1.       | 0,00                      | 8,07  | 38,34 | 33,08 |
|        | 2.       | 2,20                      | 5,31  | 23,15 | 82,50 |        | 2.       | 0,00                      | 11,18 | 34,38 | 36,89 |
|        | 3.       | 0,33                      | 3,20  | 6,32  | 9,06  |        | 3.       | 1,15                      | 31,47 | 27,36 | 25,02 |
|        | Avg      | 0,84                      | 4,99  | 17,93 | 55,27 |        | Avg      | 0,38                      | 16,91 | 33,36 | 31,66 |
|        | SD       | 1,19                      | 1,65  | 10,07 | 40,23 |        | SD       | 0,66                      | 12,71 | 5,56  | 6,06  |
| dU-4   | 1.       | 0,00                      | 0,00  | 7,57  | 63,04 | dU-4   | 1.       | 0,00                      | 89,74 | 52,47 | 38,80 |
|        | 2.       | 0,55                      | 0,97  | 6,30  | 78,72 |        | 2.       | 0,00                      | 91,49 | 54,07 | 39,32 |
|        | 3.       | 0,00                      | 2,24  | 18,02 | 23,49 |        | 3.       | 1,24                      | 57,67 | 48,13 | 44,72 |
|        | Avg      | 0,18                      | 1,07  | 10,63 | 55,08 |        | Avg      | 0,41                      | 79,63 | 51,56 | 40,95 |
|        | SD       | 0,32                      | 1,12  | 6,43  | 28,46 |        | SD       | 0,71                      | 19,04 | 3,07  | 3,28  |
| dU-7   | 1.       | 2,53                      | 73,82 | 81,68 | 77,08 | dU-7   | 1.       | 0,28                      | 79,48 | 39,88 | 18,78 |
|        | 2.       | 0,00                      | 82,62 | 93,85 | 87,47 |        | 2.       | 1,87                      | 90,66 | 41,51 | 13,46 |
|        | 3.       | 0,00                      | 77,19 | 84,31 | 94,72 |        | 3.       | 0,72                      | 52,53 | 39,74 | 28,23 |
|        | Avg      | 0,84                      | 77,88 | 86,61 | 86,42 |        | Avg      | 0,96                      | 74,22 | 40,38 | 20,16 |
|        | SD       | 1,46                      | 4,44  | 6,41  | 8,86  |        | SD       | 0,82                      | 19,60 | 0,98  | 7,48  |
| dU+1   | 1.       | 1,43                      | 3,17  | 18,68 | 58,64 | dU+1   | 1.       | 0,00                      | 69,95 | 86,05 | 85,67 |
|        | 2.       | 0,60                      | 1,19  | 13,39 | 82,12 |        | 2.       | 0,00                      | 57,01 | 88,82 | 95,16 |
|        | 3.       | 0,13                      | 4,81  | 19,43 | 74,05 |        | 3.       | 0,49                      | 47,27 | 58,87 | 69,80 |
|        | Avg      | 0,72                      | 3,06  | 17,17 | 71,60 |        | Avg      | 0,16                      | 58,08 | 77,91 | 83,54 |
|        | SD       | 0,66                      | 1,81  | 3,29  | 11,93 |        | SD       | 0,28                      | 11,38 | 16,55 | 12,81 |
| dU+4   | 1.       | 1,19                      | 2,64  | 13,43 | 45,41 | dU+4   | 1.       | 1,07                      | 27,69 | 66,03 | 56,93 |
|        | 2.       | 0,89                      | 1,77  | 10,91 | 66,59 |        | 2.       | 2,90                      | 31,21 | 53,65 | 66,57 |
|        | 3.       | 0,33                      | 7,52  | 22,42 | 61,76 |        | 3.       | 2,24                      | 37,85 | 42,39 | 43,19 |
|        | Avg      | 0,80                      | 3,98  | 15,58 | 57,92 |        | Avg      | 2,07                      | 32,25 | 54,02 | 55,56 |
|        | SD       | 0,44                      | 3,10  | 6,05  | 11,10 |        | SD       | 0,93                      | 5,16  | 11,83 | 11,75 |
| dU+7   | 1.       | 0,45                      | 10,43 | 19,35 | 13,91 | dU+7   | 1.       | 2,27                      | 86,81 | 63,04 | 54,57 |
|        | 2.       | 1,27                      | 2,84  | 16,54 | 30,64 |        | 2.       | 0,21                      | 84,48 | 66,20 | 60,46 |
|        | 3.       | 1,47                      | 5,89  | 19,34 | 32,14 |        | 3.       | 1,08                      | 53,61 | 52,08 | 53,08 |
|        | Avg      | 1,06                      | 6,39  | 18,41 | 25,56 |        | Avg      | 1,18                      | 74,96 | 60,44 | 56,04 |
|        | SD       | 0,54                      | 3,82  | 1,62  | 10,12 |        | SD       | 1,03                      | 18,53 | 7,41  | 3,90  |

**Table S7.** Polymerase activity – ScdG and RcdG. Raw numerical data of densitometry obtained from Quantity One software.

| RcdG   |          | Time [h]                |       |       |       | ScdG   |          | Time [h]                |       |       |       |
|--------|----------|-------------------------|-------|-------|-------|--------|----------|-------------------------|-------|-------|-------|
|        |          | 0                       | 0,5   | 3     | 6     |        |          | 0                       | 0,5   | 3     | 6     |
| Strand | Data set | Polymerase activity [%] |       |       |       | Strand | Data set | Polymerase activity [%] |       |       |       |
| dU0    | 1.       | 0,54                    | 0,47  | 0,71  | 12,18 | dU0    | 1.       | 0,00                    | 0,11  | 0,39  | 5,48  |
|        | 2.       | 1,13                    | 2,33  | 12,25 | 47,64 |        | 2.       | 0,00                    | 5,08  | 3,60  | 6,88  |
|        | 3.       | 2,08                    | 5,22  | 17,95 | 44,40 |        | 3.       | 0,00                    | 0,00  | 0,00  | 0,00  |
|        | Avg      | 1,25                    | 2,67  | 10,30 | 34,74 |        | Avg      | 0,00                    | 1,73  | 1,33  | 4,12  |
|        | SD       | 0,78                    | 2,39  | 8,78  | 19,60 |        | SD       | 0,00                    | 2,90  | 1,97  | 3,64  |
| dU-1   | 1.       | 0,00                    | 0,00  | 0,00  | 2,69  | dU-1   | 1.       | 1,41                    | 5,04  | 28,71 | 61,81 |
|        | 2.       | 0,62                    | 0,71  | 1,09  | 3,69  |        | 2.       | 1,94                    | 1,16  | 21,72 | 39,25 |
|        | 3.       | 1,15                    | 11,76 | 29,72 | 81,46 |        | 3.       | 0,00                    | 8,99  | 23,41 | 51,96 |
|        | Avg      | 0,59                    | 4,16  | 10,27 | 29,28 |        | Avg      | 1,11                    | 5,06  | 24,61 | 51,01 |
|        | SD       | 0,58                    | 6,60  | 16,86 | 45,19 |        | SD       | 1,00                    | 3,92  | 3,64  | 11,31 |
| dU-4   | 1.       | 0,00                    | 0,00  | 0,00  | 0,60  | dU-4   | 1.       | 0,00                    | 9,70  | 47,47 | 61,13 |
|        | 2.       | 0,00                    | 0,00  | 0,00  | 0,13  |        | 2.       | 0,00                    | 6,09  | 45,34 | 60,05 |
|        | 3.       | 0,00                    | 5,34  | 17,32 | 72,03 |        | 3.       | 0,00                    | 30,25 | 47,09 | 52,01 |
|        | Avg      | 0,00                    | 1,78  | 5,77  | 24,25 |        | Avg      | 0,00                    | 15,35 | 46,64 | 57,73 |
|        | SD       | 0,00                    | 3,08  | 10,00 | 41,37 |        | SD       | 0,00                    | 13,03 | 1,13  | 4,98  |
| dU-7   | 1.       | 0,00                    | 9,40  | 12,05 | 18,83 | dU-7   | 1.       | 2,50                    | 17,11 | 58,97 | 81,01 |
|        | 2.       | 0,00                    | 0,00  | 0,36  | 11,33 |        | 2.       | 0,34                    | 6,89  | 57,65 | 85,37 |
|        | 3.       | 1,36                    | 0,83  | 4,27  | 4,20  |        | 3.       | 8,89                    | 27,44 | 54,82 | 67,03 |
|        | Avg      | 0,45                    | 3,41  | 5,56  | 11,45 |        | Avg      | 3,91                    | 17,15 | 57,15 | 77,80 |
|        | SD       | 0,78                    | 5,20  | 5,95  | 7,32  |        | SD       | 4,45                    | 10,28 | 2,12  | 9,58  |
| dU+1   | 1.       | 0,33                    | 0,31  | 0,84  | 5,83  | dU+1   | 1.       | 0,81                    | 2,73  | 2,16  | 2,07  |
|        | 2.       | 0,25                    | 0,20  | 0,42  | 2,48  |        | 2.       | 0,00                    | 1,29  | 3,45  | 0,33  |
|        | 3.       | 2,22                    | 1,69  | 2,09  | 4,62  |        | 3.       | 0,00                    | 4,89  | 8,57  | 5,15  |
|        | Avg      | 0,93                    | 0,73  | 1,12  | 4,31  |        | Avg      | 0,27                    | 2,97  | 4,73  | 2,51  |
|        | SD       | 1,11                    | 0,83  | 0,87  | 1,70  |        | SD       | 0,47                    | 1,81  | 3,39  | 2,44  |
| dU+4   | 1.       | 1,07                    | 0,77  | 0,90  | 1,07  | dU+4   | 1.       | 0,00                    | 14,91 | 24,25 | 37,13 |
|        | 2.       | 1,03                    | 0,97  | 0,77  | 1,87  |        | 2.       | 0,05                    | 14,51 | 18,46 | 27,86 |
|        | 3.       | 0,44                    | 4,30  | 5,06  | 4,35  |        | 3.       | 0,00                    | 25,93 | 36,99 | 38,93 |
|        | Avg      | 0,85                    | 2,01  | 2,24  | 2,43  |        | Avg      | 0,02                    | 18,45 | 26,57 | 34,64 |
|        | SD       | 0,35                    | 1,98  | 2,44  | 1,71  |        | SD       | 0,03                    | 6,48  | 9,48  | 5,94  |
| dU+7   | 1.       | 2,72                    | 3,97  | 15,31 | 47,85 | dU+7   | 1.       | 0,00                    | 11,11 | 36,85 | 45,40 |
|        | 2.       | 1,64                    | 3,18  | 10,41 | 36,39 |        | 2.       | 0,04                    | 10,19 | 32,92 | 39,18 |
|        | 3.       | 1,35                    | 9,93  | 15,28 | 33,45 |        | 3.       | 1,93                    | 16,69 | 30,97 | 33,33 |
|        | Avg      | 1,90                    | 5,69  | 13,66 | 39,23 |        | Avg      | 0,66                    | 12,66 | 33,58 | 39,30 |
|        | SD       | 0,72                    | 3,69  | 2,82  | 7,61  |        | SD       | 1,10                    | 3,52  | 3,00  | 6,03  |

A.

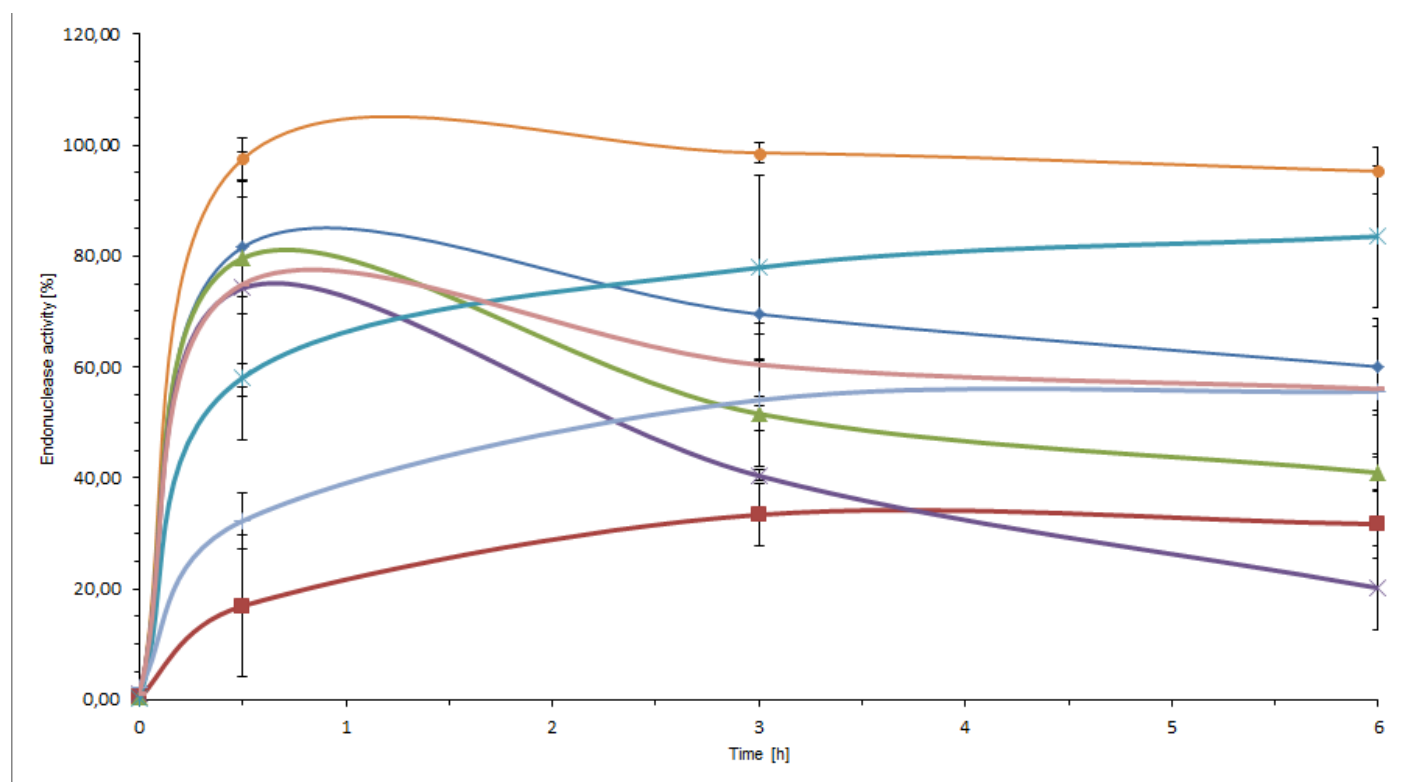

B.

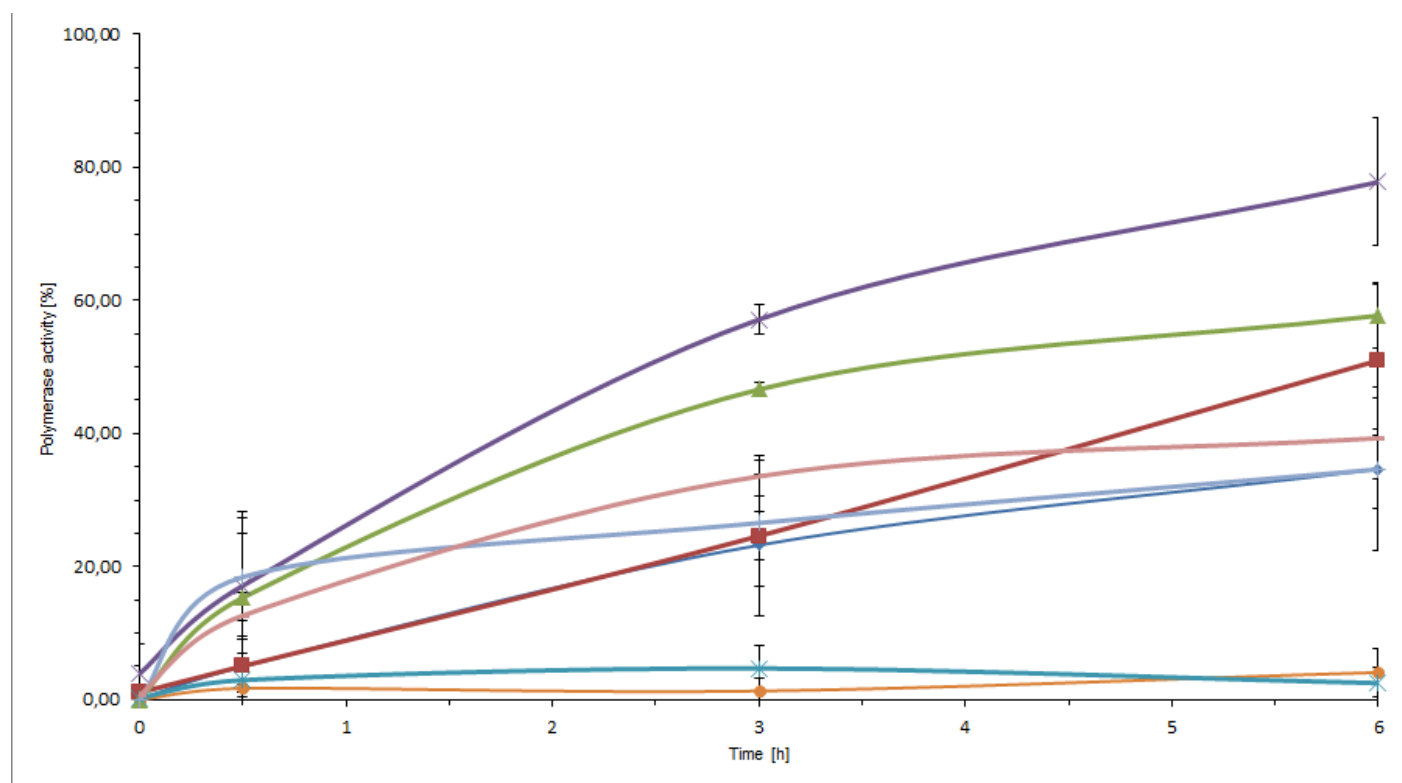



C.



**Figure S10.** Graphical representation of the results for ScdG. (A) endonuclease activity +SD, (B) polymerase activity + SD; (C) figure legend.

A.

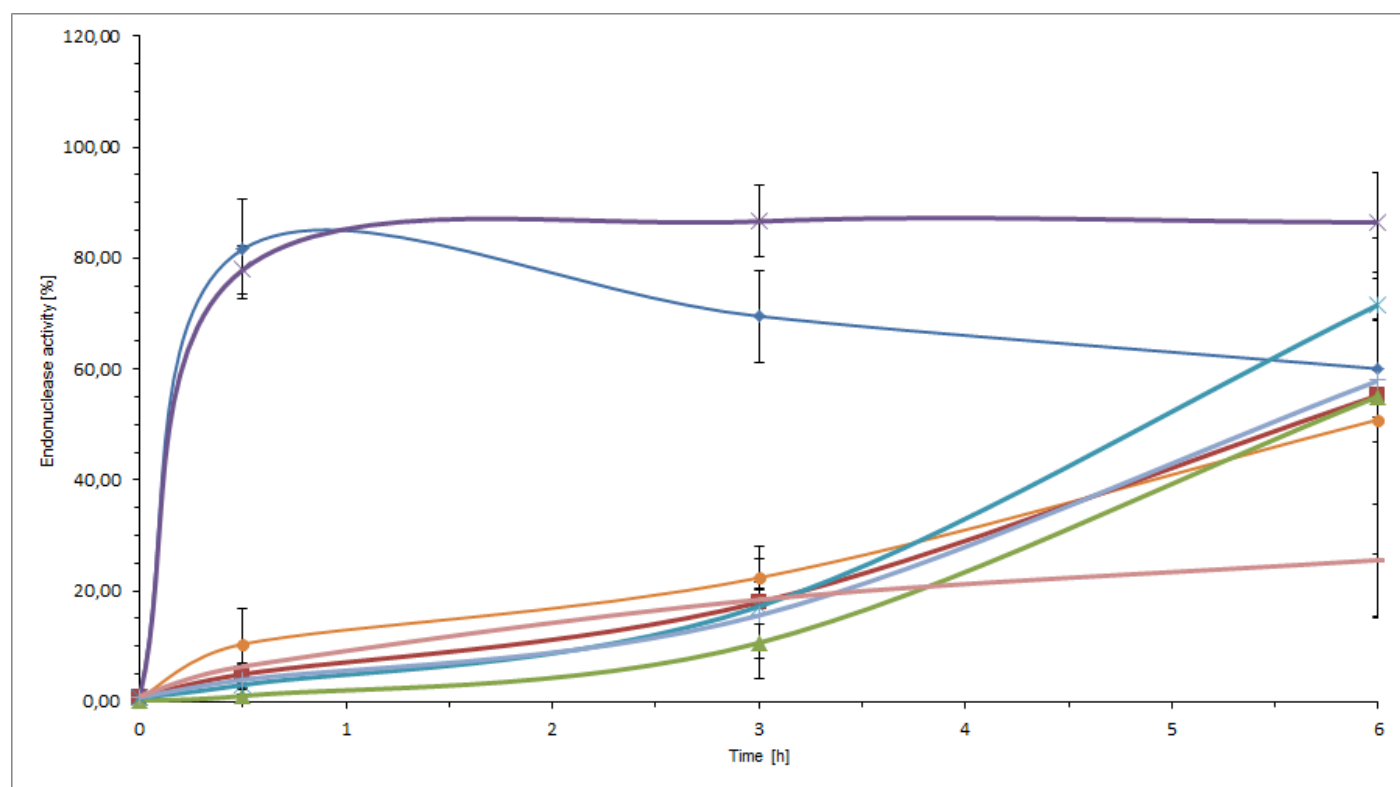

B.

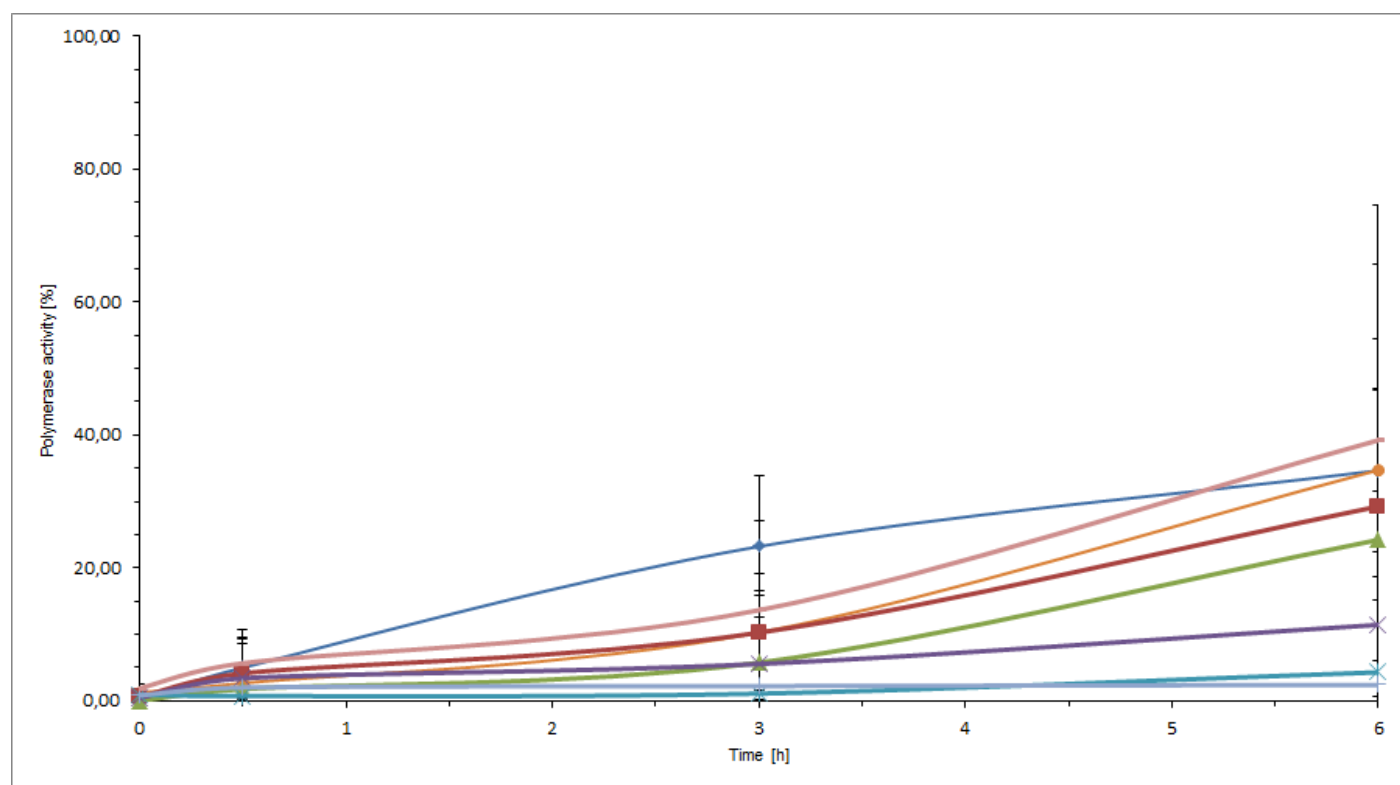

C.

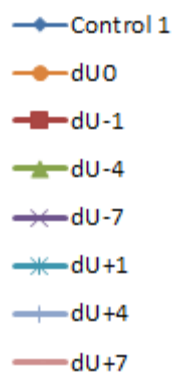

**Figure S11.** Graphical representation of the results for RcdG. (A) endonuclease activity +SD, (B) polymerase activity +SD; (C) figure legend.

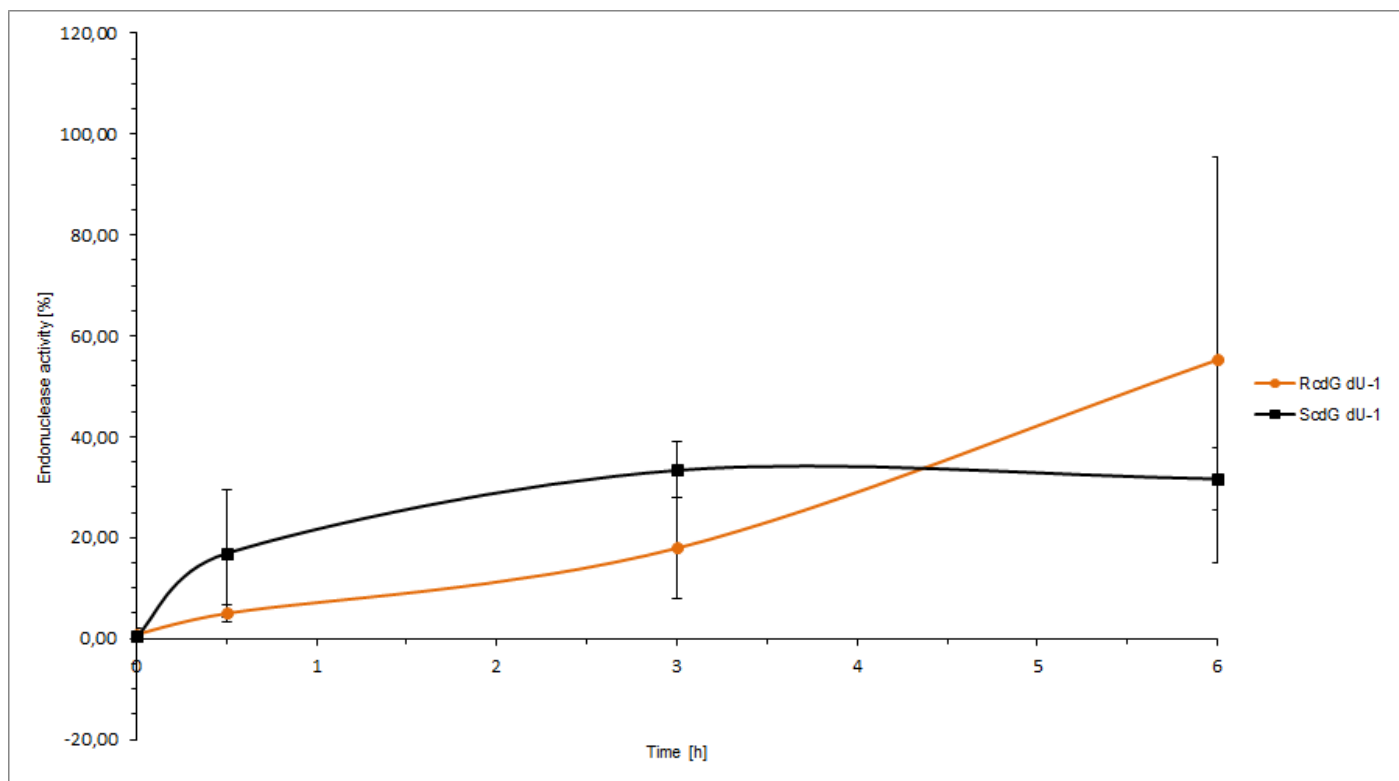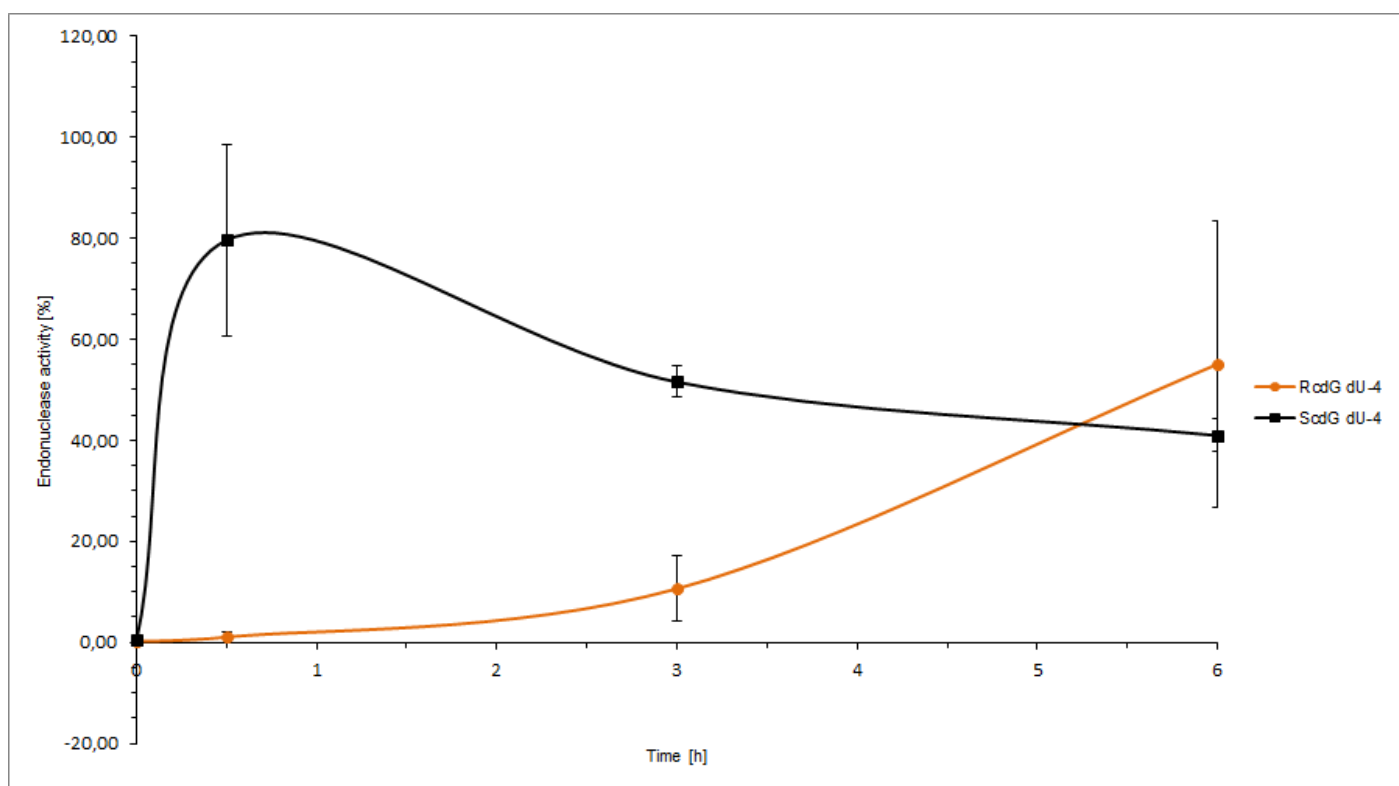

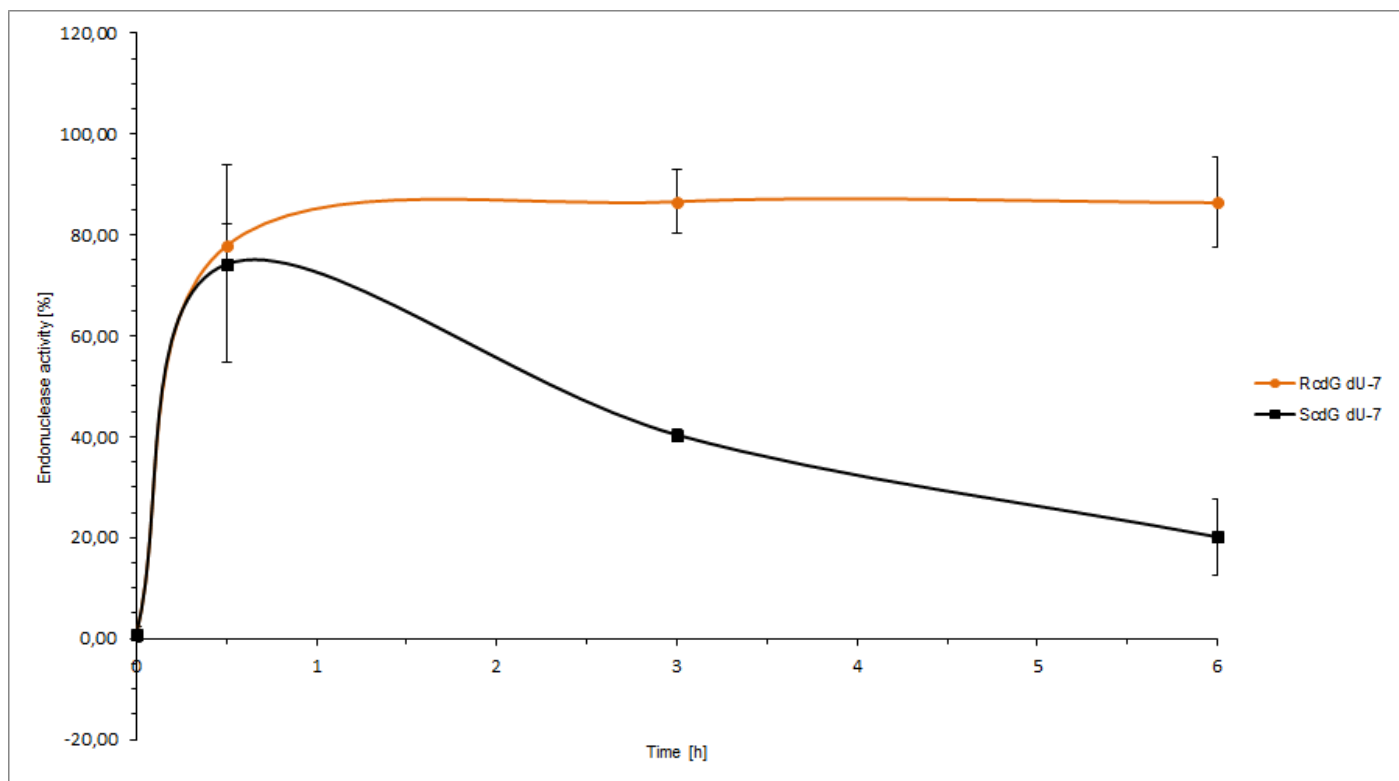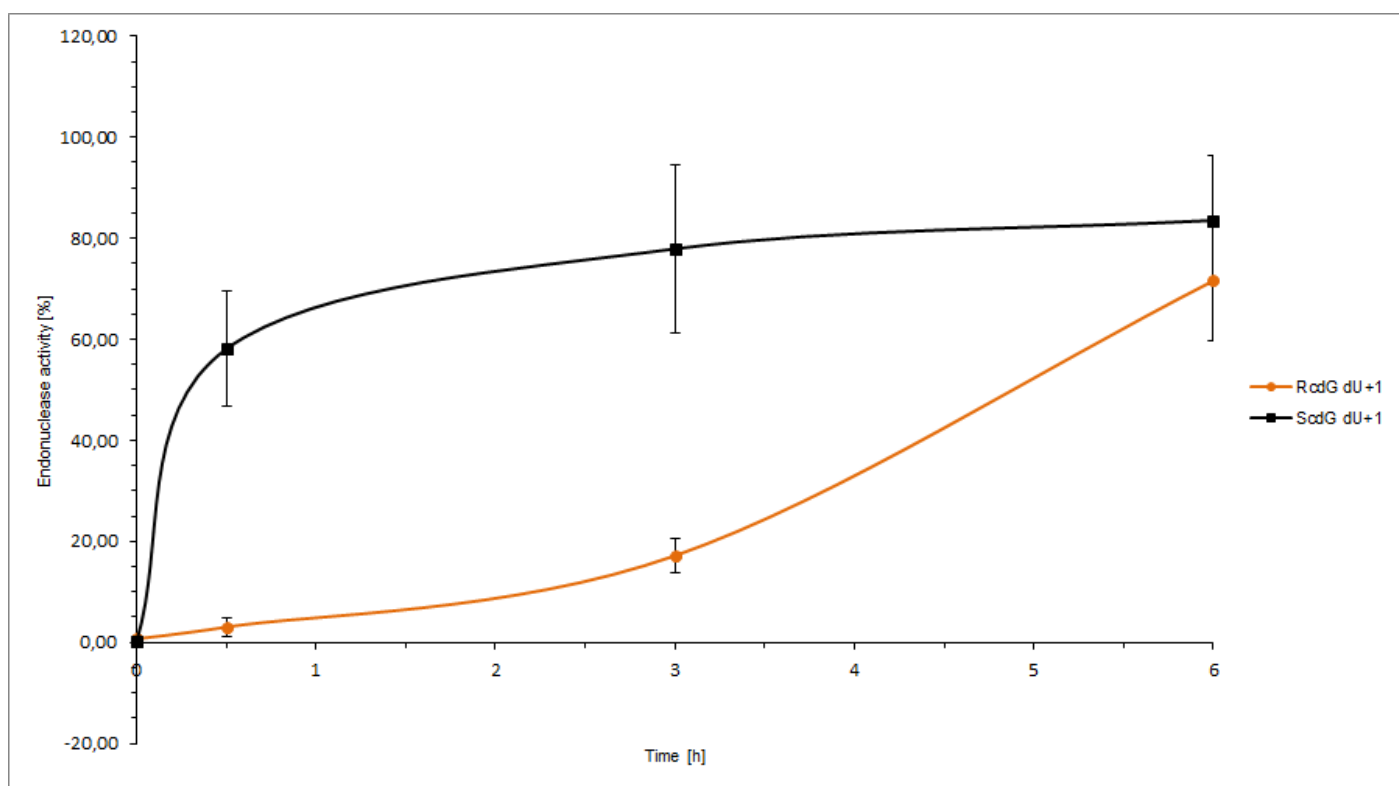

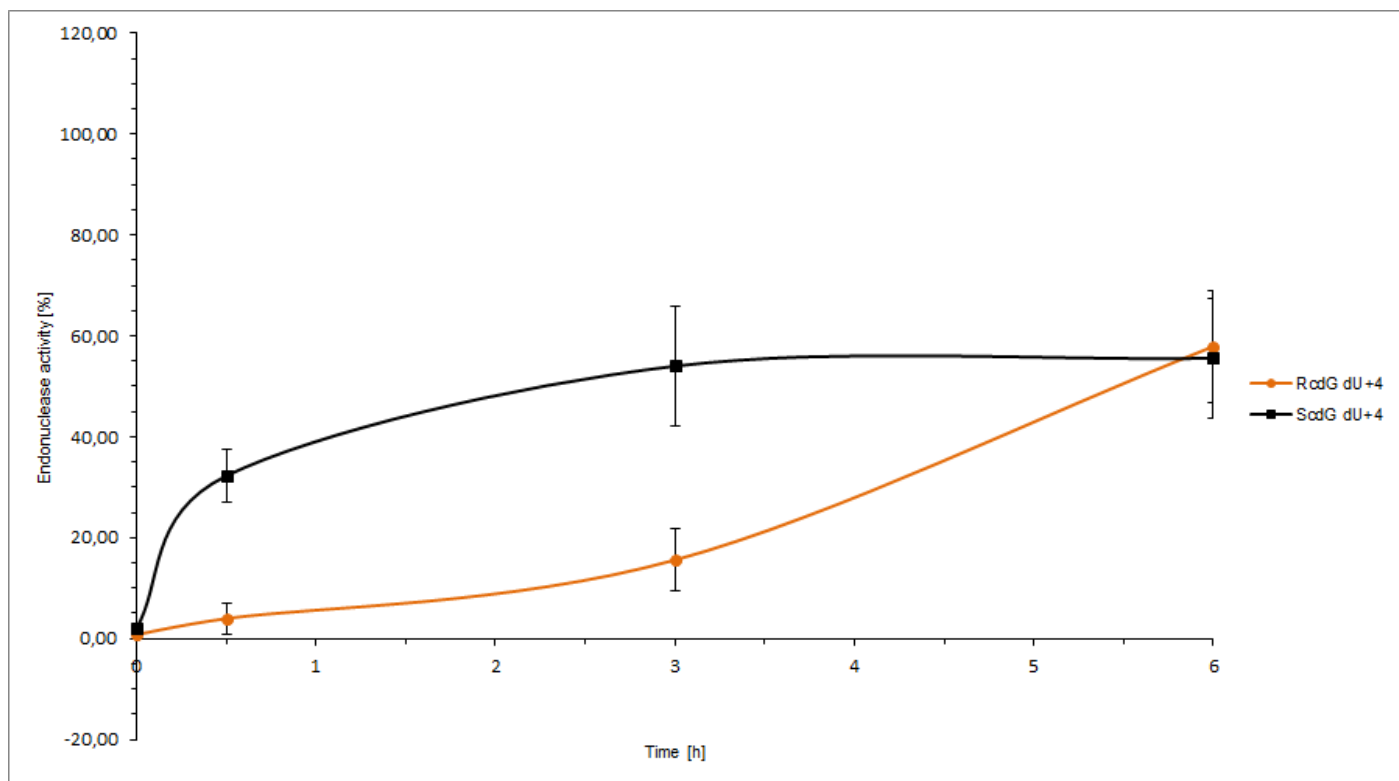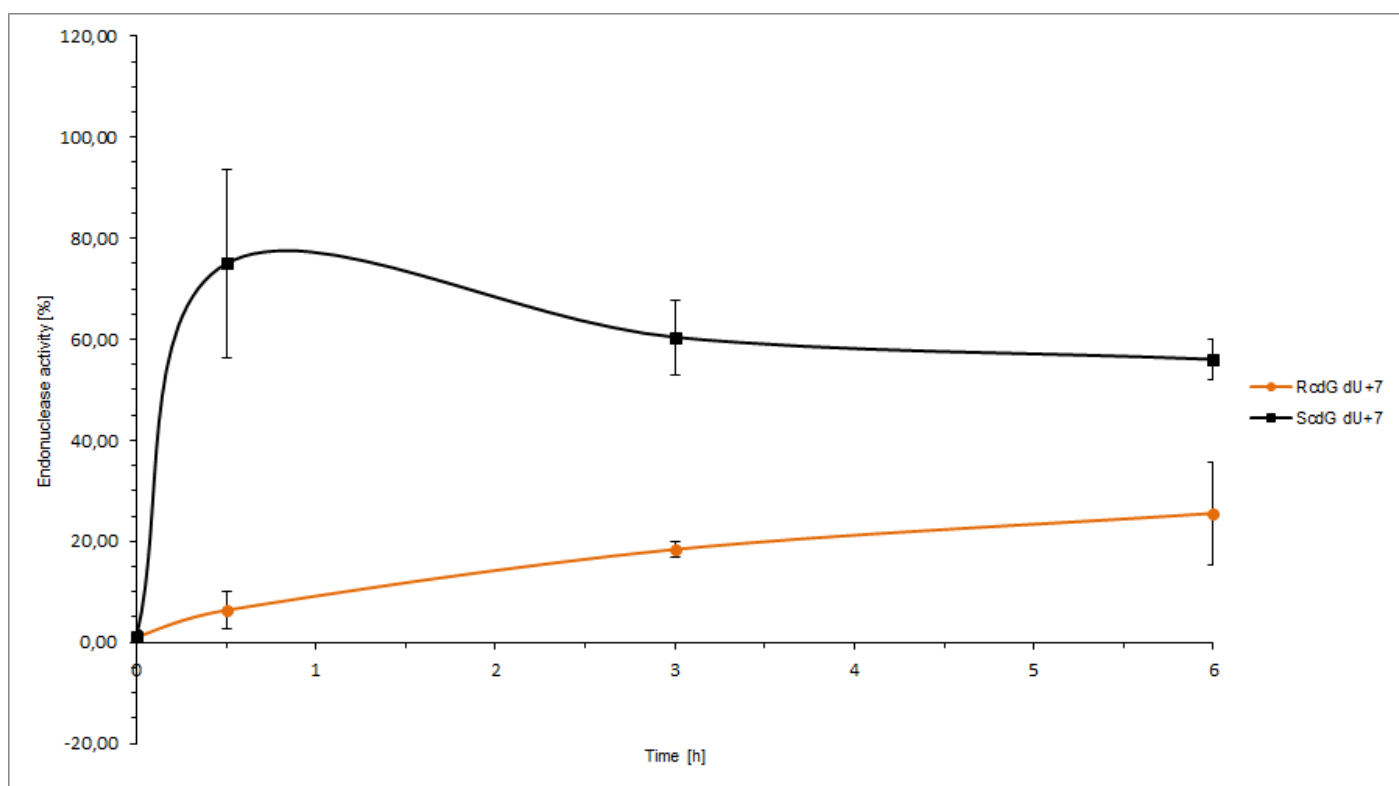

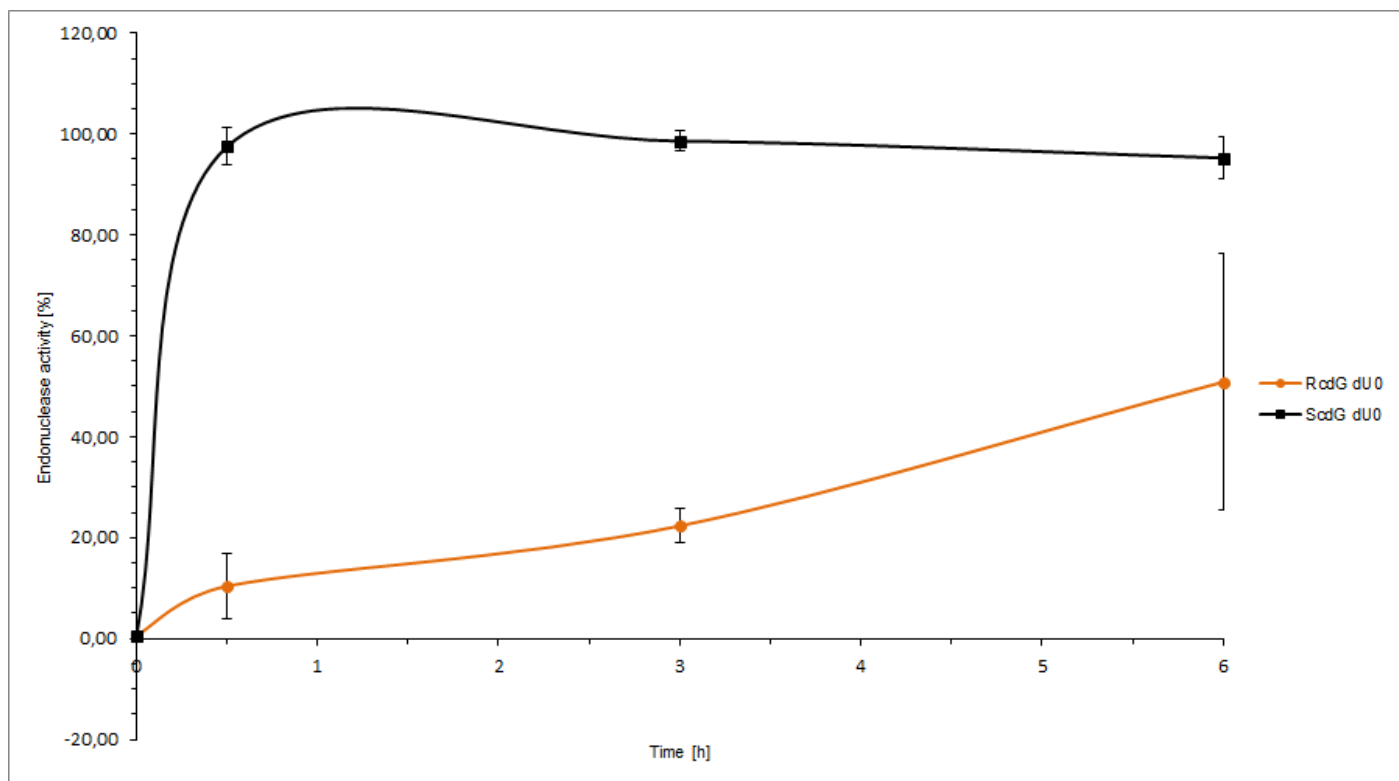

**Figure S12.** Endonuclease activity [%] of ScdG vs. RcdG – comparison of individual strands.

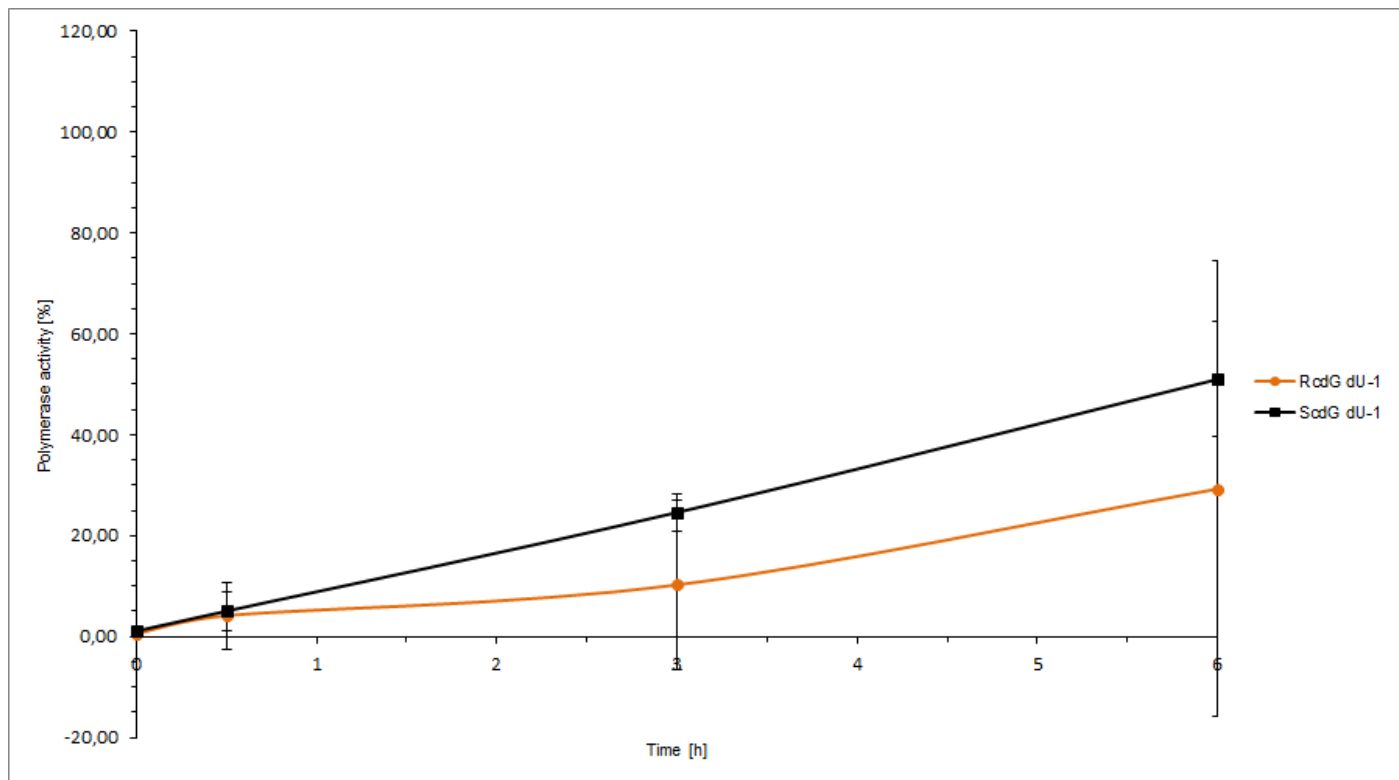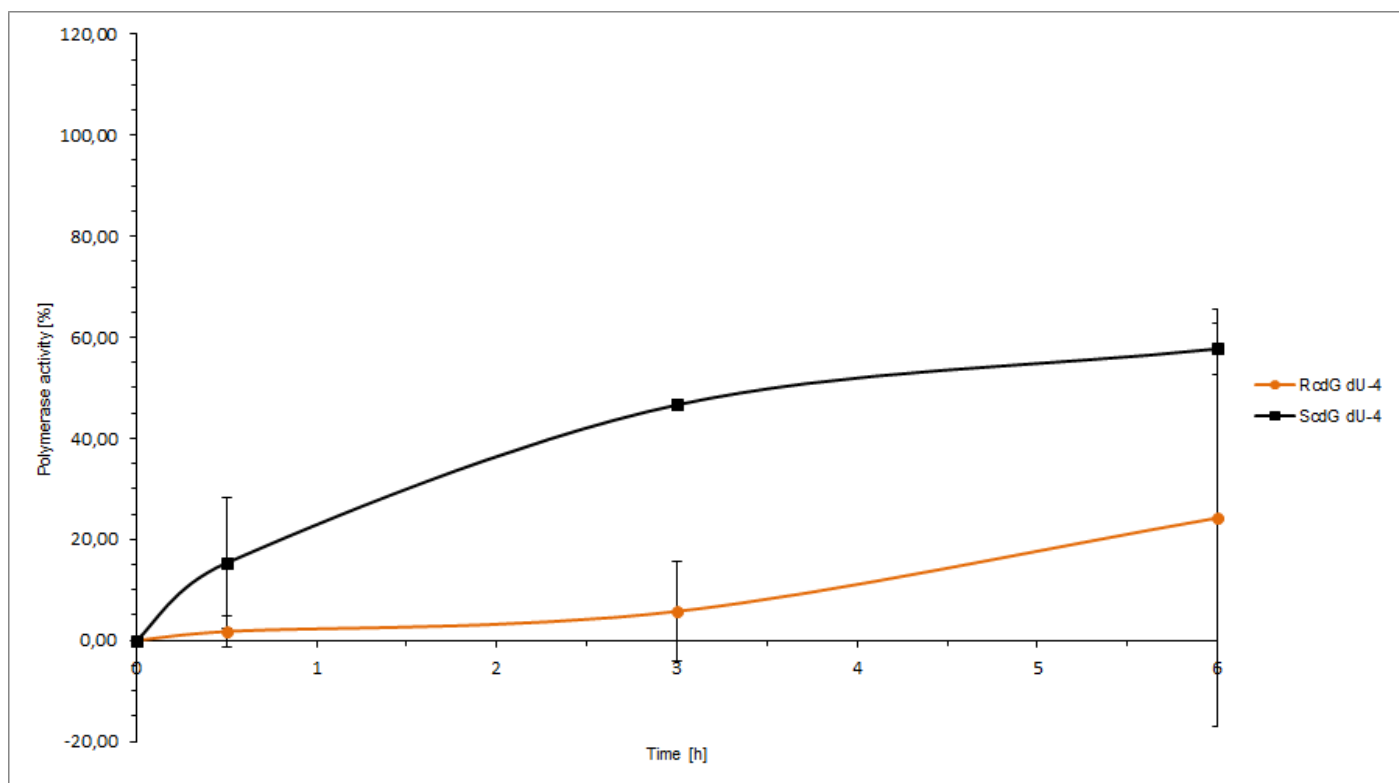

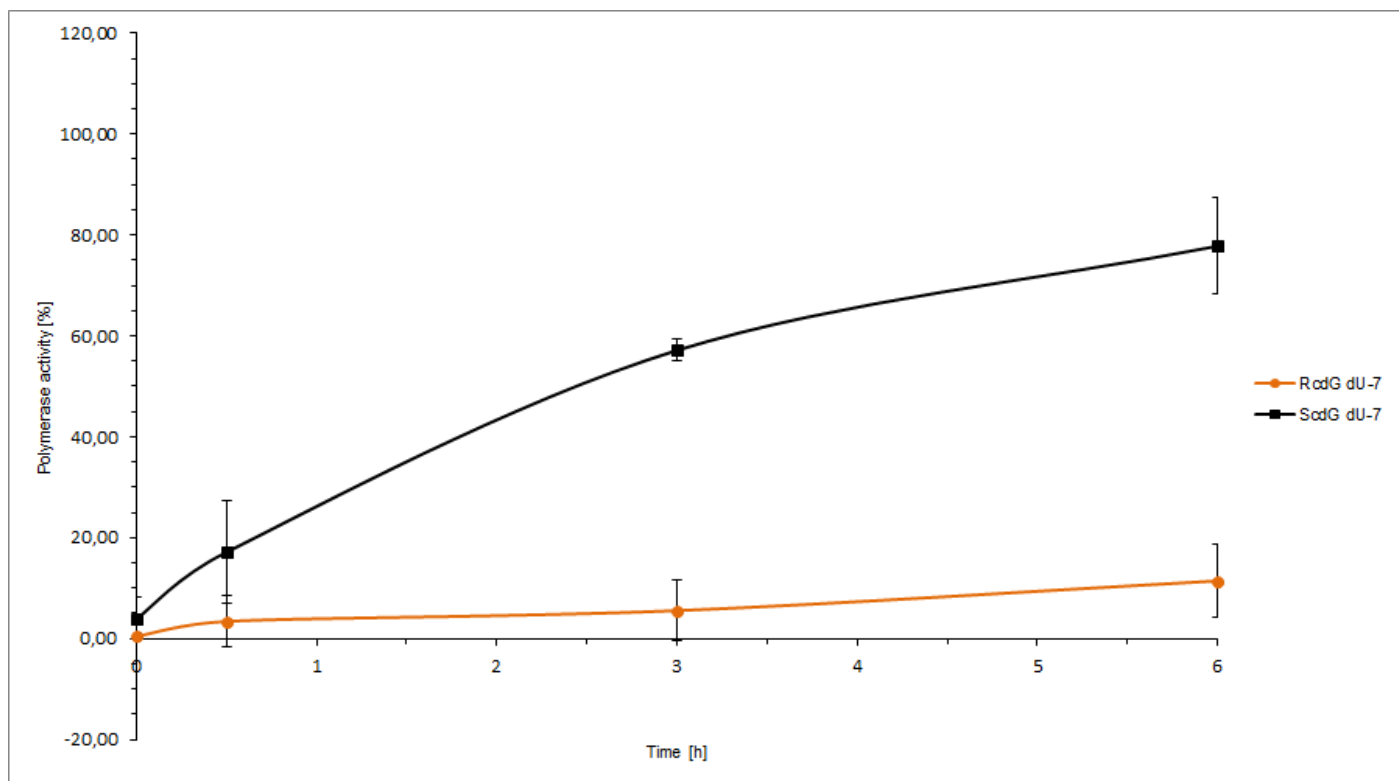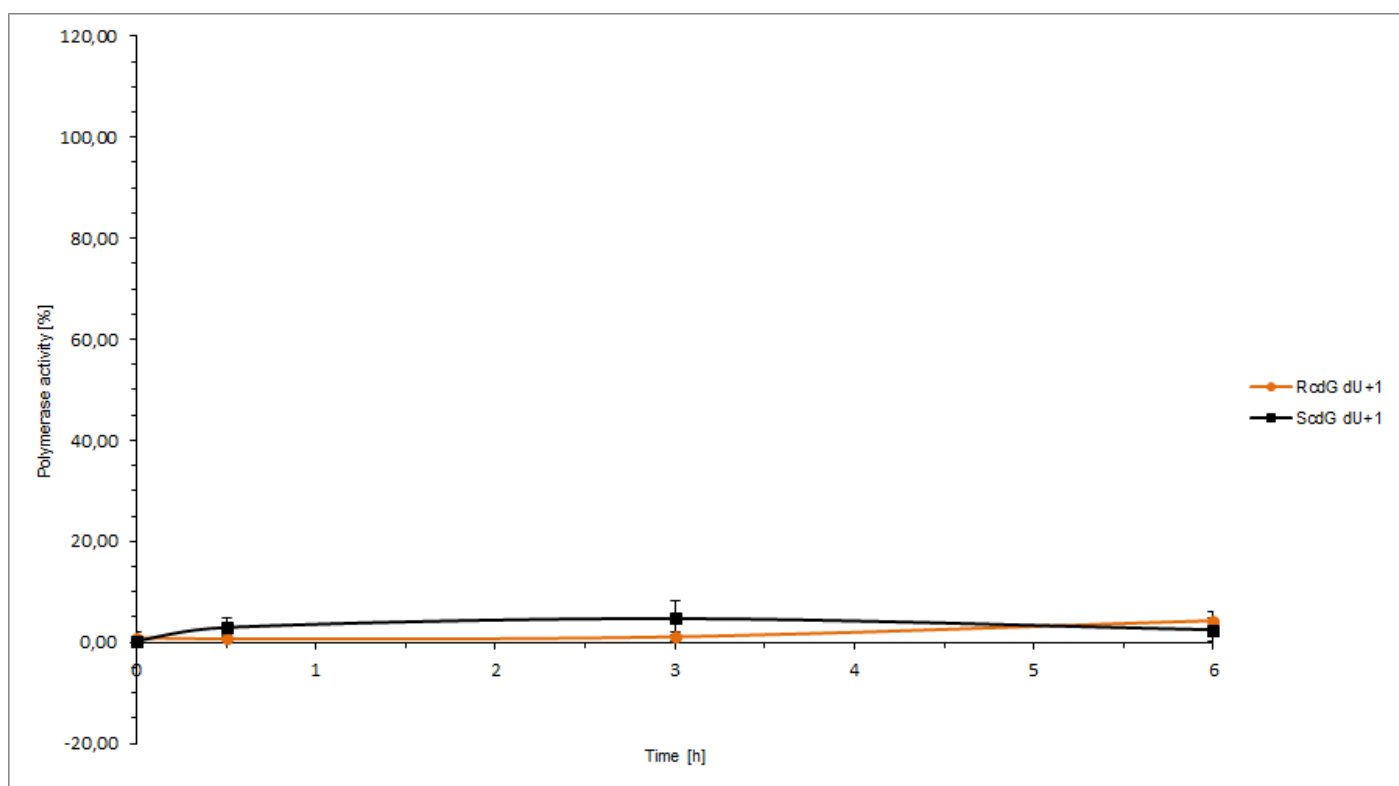



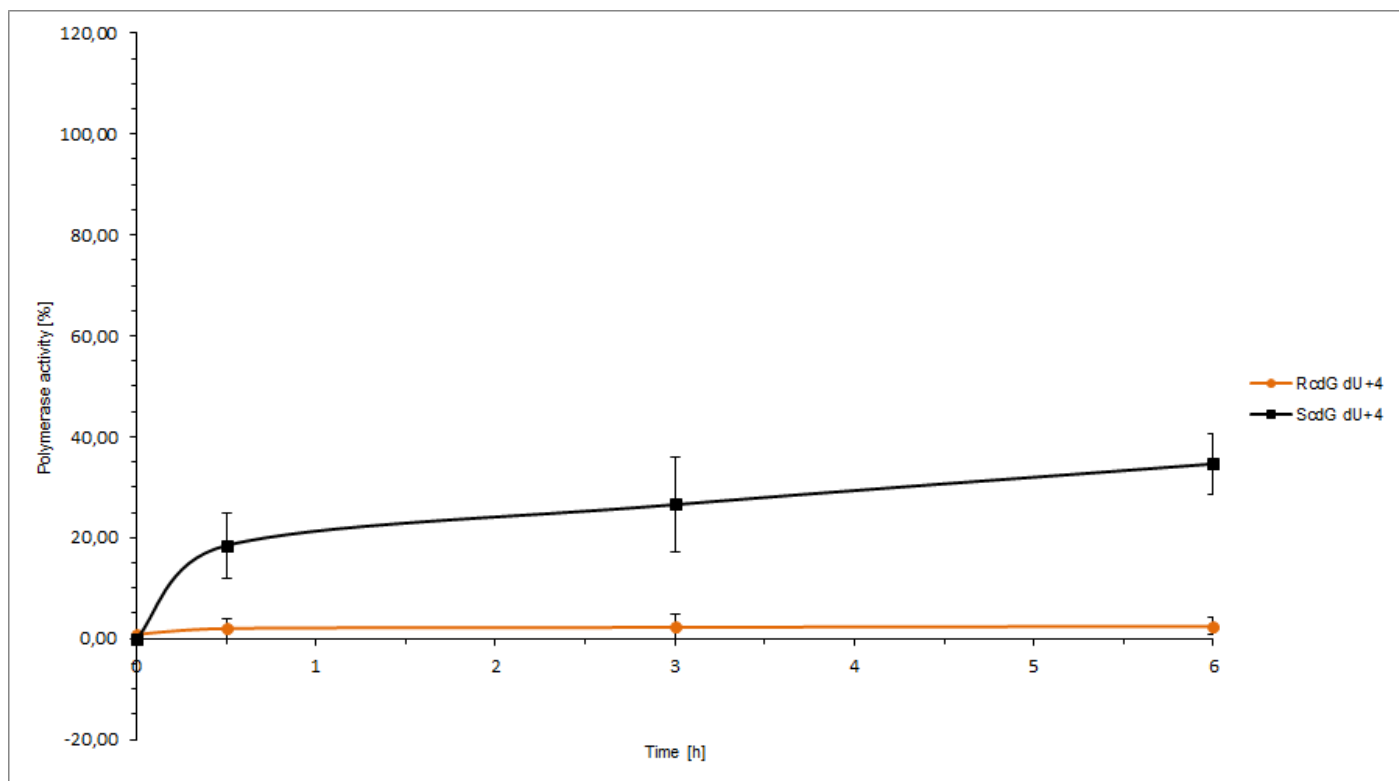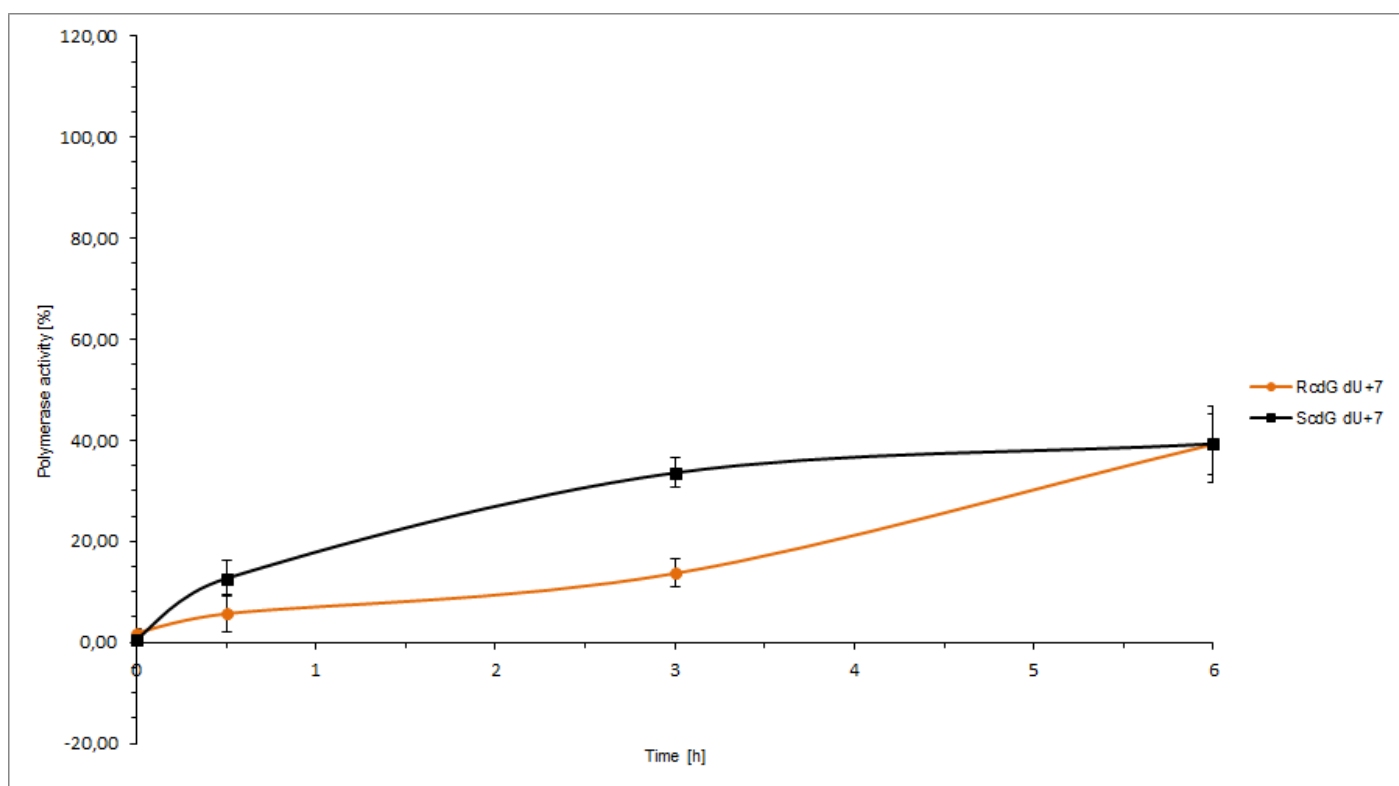

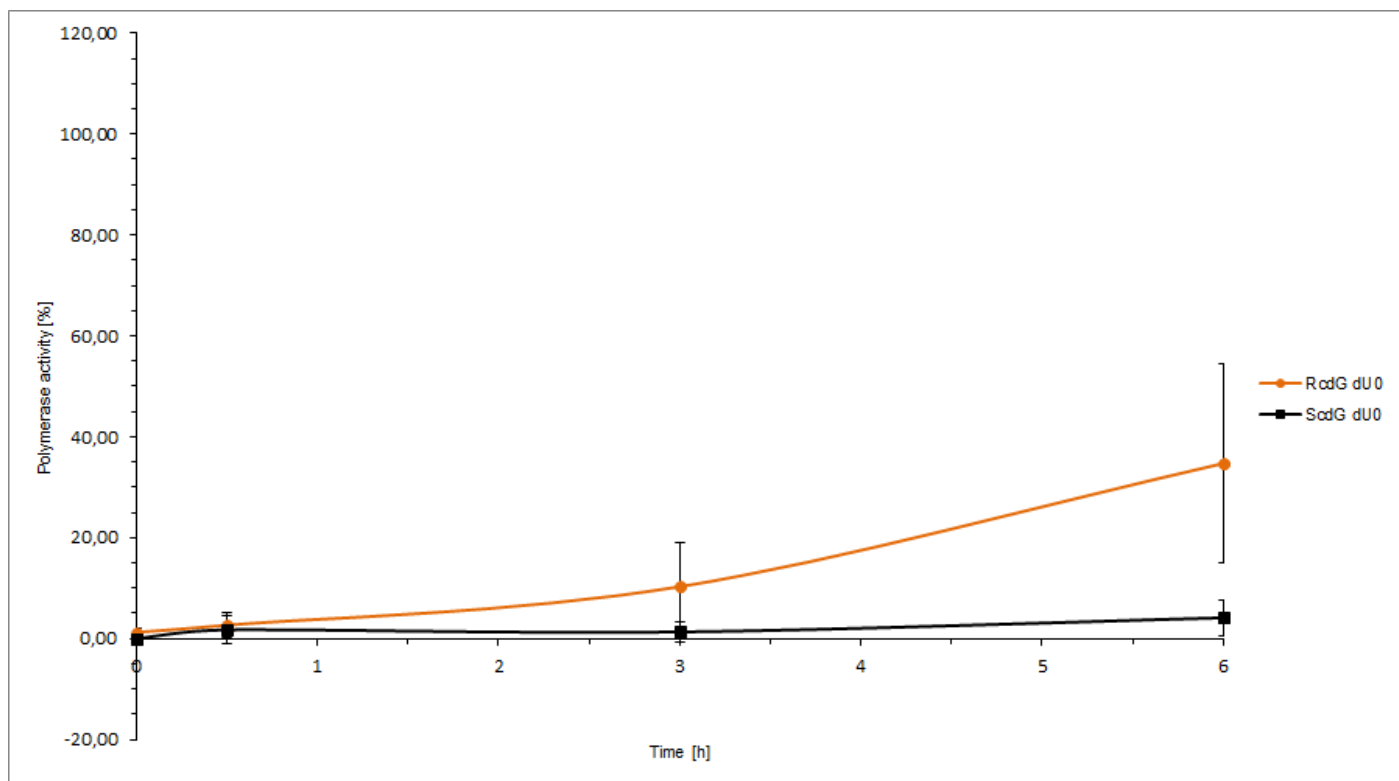

**Figure S13.** Polymerase activity [%] of ScdG vs. RcdG – comparison of individual strands.

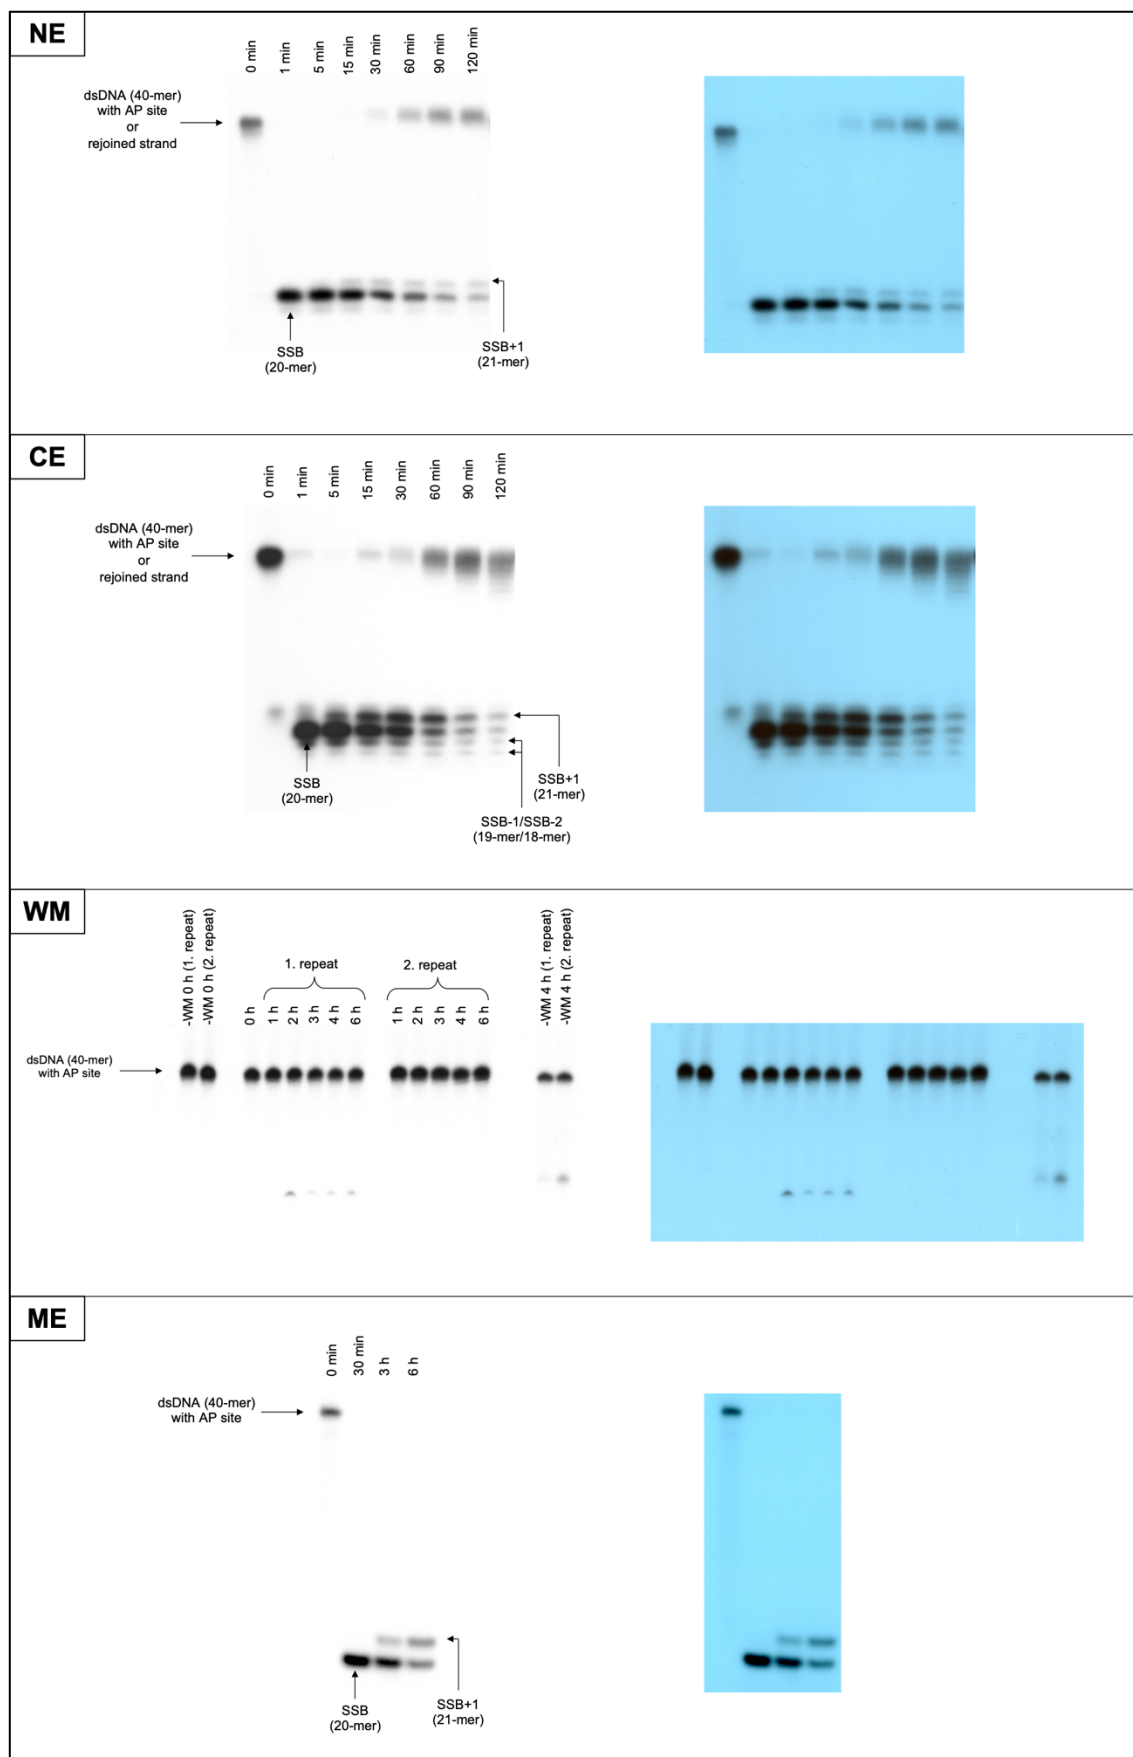

**Figure S14.** Functional activity test of mitochondrial extract (ME, 20  $\mu$ g) by comparison with whole mitochondria fraction (WM, 20  $\mu$ g), nuclear extract (NE, 10  $\mu$ g), and cytoplasmic extract (CE, 10  $\mu$ g) of *xrs5* cell line using Control 1 (ds-oligo with single AP site lesion). SSB – single strand break (AP site cleavage resulting from endonucleolytic activity of ME, NE, and CE), SSB+1 - cleaved strand with 1 nucleotide incorporated (resulting from polymerase activity of ME, NE, and CE); SSB-1/SSB-2 - cleaved strand with 1 or 2 nucleotides cleaved (resulting from exonucleolytic activity of CE). Original scans of X-ray films are presented on the right, and annotated, graphically processed radiograms are presented on the left.
